# Supplementary material for: AKT/AMPK-mediated phosphorylation of TBC1D4 disrupts the interaction with insulin-regulated aminopeptidase
Source: PubMed Central journal article supplement (PMC8131924; doi:10.1016/j.jbc.2021.100637), 2021-04-16
Supplement: mmc1.pdf [file mmc1.pdf]

| Residue Position | Annotated Sequence                     | Precursor Mass [m/z] | Charge State | HTSequest Score [Xcorr] | Modifications                                                                                | ptmRS: for indicated phospho site |
|------------------|----------------------------------------|----------------------|--------------|-------------------------|----------------------------------------------------------------------------------------------|-----------------------------------|
| Ser258           | GGDPGDDEMGVLEVESPVSPDDSLPEK            | 1376.5820            | +2           | 2.56                    | S15-Phospho (79.9663 Da)<br>M8-Oxidation (15.9949 Da)                                        | 100                               |
| Ser261           | GGDPGDDEMGVLEVESPVSPDDSLPEKADGTVNSPR   | 1211.8689            | +3           | 6.5                     | S18-Phospho (79.9663 Da)                                                                     | 99.9                              |
| Ser276           | ADGTVNSPR                              | 498.7099             | +2           | 3.1                     | S7-Phospho (79.9663 Da)                                                                      | 100                               |
| Ser324           | CSSVTGVMQK                             | 591.7481             | +2           | 2.32                    | S3-heavyPhospho (85.9663 Da)<br>C1-Carbamidomethyl (57.02146 Da)                             | 100                               |
| Ser348           | HASAPSHVQPSDSEKNR                      | 483.9694             | +4           | 2.81                    | S3-heavyPhospho (85.9663 Da)                                                                 | 100                               |
| Ser377           | FEINLISPDK                             | 678.8242             | +2           | 2.55                    | S7-Phospho (79.9663 Da)                                                                      | 100                               |
| Ser492           | HLSSLTNEQADIFER                        | 978.7336             | +2           | 3.64                    | S3-Phospho (79.9663 Da)                                                                      | 100                               |
| Ser577           | SLTSSLENIFSR                           | 720.3439             | +2           | 2.25                    | S5-heavyPhospho (85.9663 Da)                                                                 | 99.65                             |
| Ser595           | GRLGSMDSFER                            | 447.5273             | +3           | 2.8                     | S5-heavyPhospho (85.9663 Da)                                                                 | 100                               |
| Ser598           | LGSMDSFER                              | 561.2192             | +2           | 3.13                    | S6-Phospho (79.9663 Da)                                                                      | 100                               |
| Thr649           | AHTFSHPSSSR                            | 466.2053             | +3           | 3.51                    | T3-heavyPhospho (85.9663 Da)                                                                 | 100                               |
| Ser673           | AHGLRSPLLR                             | 400.5511             | +3           | 3.63                    | S6-Phospho (79.9663 Da)                                                                      | 100                               |
| Ser680           | QSSSEQCSIVPSAR                         | 808.3406             | +2           | 3.61                    | S3-Phospho (79.9663 Da)<br>C7-Carbamidomethyl (57.02146 Da)                                  | 100                               |
| Ser711           | ESNSSCSLPSLHTSFsAPSFTAPSFLK            | 991.7851             | +3           | 2.61                    | S16-heavyPhospho (85.9663 Da)<br>C6-Carbamidomethyl (57.02146 Da)                            | 99.28                             |
| Ser761           | RTSSTCSNESLNAGGTPVTPR                  | 758.3388             | +3           | 5.88                    | S7-Phospho (79.9663 Da)<br>C6-Carbamidomethyl (57.02146 Da)                                  | 100                               |
| Ser764           | RTSSTCSNESLNAGGTPVTPR                  | 1179.4944            | +2           | 2.06                    | S10-heavyPhospho (85.9663 Da)<br>S7-Phospho (79.9663 Da)<br>C6-Carbamidomethyl (57.02146 Da) | 99.06                             |
| Ser789           | VASPVNK                                | 397.6930             | +2           | 2.91                    | S3-Phospho (79.9663 Da)                                                                      | 100                               |
| Ser794           | VASPVNKsPSAMQQQK                       | 890.9289             | +2           | 4.74                    | S8-Phospho (79.9663 Da)                                                                      | 100                               |
| Ser817           | DGLDRTELLPLSLsPTMEEELIIFLGSDEDETEKVEEK | 1121.5419            | +4           | 2.72                    | S15-Phospho (79.9663 Da)<br>M18-Oxidation (15.9949 Da)                                       | 97.26                             |

# Ser258

Sequence: GGDPGDEMGVLEVESPVSPDDSLPEK, S15-Phospho (79.96633 Da), M8-Oxidation (15.99492 Da)

Charge: +2, Monoisotopic m/z: 1376.08144 Da (-1.72 mmu/-1.25 ppm), MH+: 2751.15561 Da,

RT: 84.3465 min, Identified with: Sequest HT (v1.17); XCorr:2.56,

ptmRS: Best Site Probabilities:S15(Phospho): 100, Fragment match tolerance used for search: 0.02 Da

08062020\_Nano1\_uPAC50\_9143\_dht-ATP\_2h\_DDA\_HCD-ETD raw #20162 RT: 84.3465 min  
 FTMS: 1376.5620@hcd52.00, z=+2, Mono m/z=1376.08144 Da, MH+=2751.15561 Da, Match Tol=0.02 Da

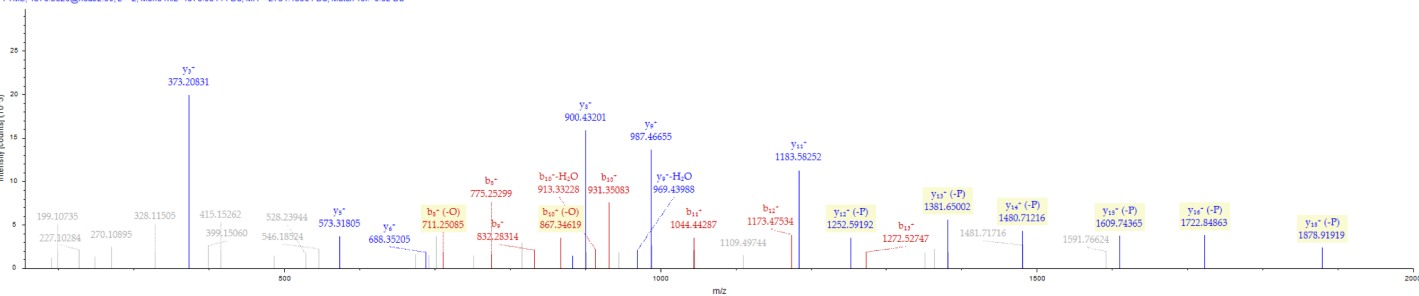

| #1 | b+         | b2+        | c+         | c2+        | Seq.        | y+         | y2+        | z+         | z+H+       | z+H2+      | z2+        | z-H+       | z-H2+      | #2 |
|----|------------|------------|------------|------------|-------------|------------|------------|------------|------------|------------|------------|------------|------------|----|
| 1  | 58.02874   | 29.51801   | 75.05529   | 38.03128   | G           |            |            |            |            |            |            |            |            | 26 |
| 2  | 115.05020  | 58.02874   | 132.07675  | 66.54201   | G           | 2694.13758 | 1347.57243 | 2679.12668 | 2680.13451 | 1340.57089 | 1340.06698 | 2678.11886 | 1339.56307 | 25 |
| 3  | 230.07715  | 115.54221  | 247.10370  | 124.05549  | D           | 2637.11612 | 1319.06170 | 2622.10522 | 2623.11304 | 1312.06016 | 1311.55625 | 2621.09739 | 1311.05233 | 24 |
| 4  | 327.12991  | 164.06859  | 344.15646  | 172.58187  | P           | 2522.08917 | 1261.54822 | 2507.07827 | 2508.08610 | 1254.54669 | 1254.04278 | 2506.07045 | 1253.53886 | 23 |
| 5  | 384.15137  | 192.57933  | 401.17792  | 201.09260  | G           | 2425.03641 | 1213.02184 | 2410.02551 | 2411.03334 | 1206.02031 | 1205.51639 | 2409.01768 | 1205.01248 | 22 |
| 6  | 499.17832  | 250.09280  | 516.20487  | 258.60607  | D           | 2368.01495 | 1184.51111 | 2353.00405 | 2354.01187 | 1177.50957 | 1177.00566 | 2351.99622 | 1176.50175 | 21 |
| 7  | 628.22091  | 314.61409  | 645.24746  | 323.12737  | E           | 2252.98800 | 1126.99764 | 2237.97710 | 2238.98493 | 1119.99610 | 1119.49219 | 2236.96928 | 1118.98828 | 20 |
| 8  | 775.25631  | 388.13179  | 792.28286  | 396.64507  | M-Oxidation | 2123.94541 | 1062.47634 | 2108.93451 | 2109.94234 | 1055.47481 | 1054.97089 | 2107.92669 | 1054.46698 | 19 |
| 9  | 832.27777  | 416.64253  | 849.30432  | 425.15580  | G           | 1976.91001 | 988.95864  | 1961.89911 | 1962.90694 | 981.95711  | 981.45319  | 1960.89129 | 980.94928  | 18 |
| 10 | 931.34619  | 466.17673  | 948.37274  | 474.69001  | V           | 1919.88855 | 960.44791  | 1904.87765 | 1905.88547 | 953.44637  | 952.94246  | 1903.86982 | 952.43855  | 17 |
| 11 | 1044.43025 | 522.71876  | 1061.45680 | 531.23204  | L           | 1820.82013 | 910.91370  | 1805.80923 | 1806.81706 | 903.91217  | 903.40825  | 1804.80141 | 902.90434  | 16 |
| 12 | 1173.47284 | 587.24006  | 1190.49939 | 595.75334  | E           | 1707.73607 | 854.37167  | 1692.72517 | 1693.73299 | 847.37014  | 846.86622  | 1691.71734 | 846.36231  | 15 |
| 13 | 1272.54126 | 636.77427  | 1289.56781 | 645.28754  | V           | 1578.69348 | 789.85038  | 1563.68258 | 1564.69040 | 782.84884  | 782.34493  | 1562.67475 | 781.84101  | 14 |
| 14 | 1401.58385 | 701.29556  | 1418.61040 | 709.80884  | E           | 1479.62506 | 740.31617  | 1464.61416 | 1465.62199 | 733.31463  | 732.81072  | 1463.60634 | 732.30681  | 13 |
| 15 | 1568.58221 | 784.79474  | 1585.60876 | 793.30802  | S-Phospho   | 1350.58247 | 675.79487  | 1335.57157 | 1336.57939 | 668.79334  | 668.28942  | 1334.56374 | 667.78551  | 12 |
| 16 | 1665.63497 | 833.32113  | 1682.66152 | 841.83440  | P           | 1183.58411 | 592.29569  | 1168.57321 | 1169.58104 | 585.29416  | 584.79024  | 1167.56539 | 584.28633  | 11 |
| 17 | 1764.70339 | 882.85633  | 1781.72994 | 891.36861  | V           | 1086.53135 | 543.76931  | 1071.52045 | 1072.52827 | 536.76777  | 536.26386  | 1070.51262 | 535.75995  | 10 |
| 18 | 1851.73542 | 926.37135  | 1868.76197 | 934.88462  | S           | 987.46293  | 494.23510  | 972.45203  | 973.45986  | 487.23357  | 486.72965  | 971.44421  | 486.22574  | 9  |
| 19 | 1948.78818 | 974.89773  | 1965.81473 | 983.41100  | P           | 900.43090  | 450.71909  | 885.42000  | 886.42783  | 443.71755  | 443.21364  | 884.41218  | 442.70973  | 8  |
| 20 | 2063.81512 | 1032.41120 | 2080.84167 | 1040.92447 | D           | 803.37814  | 402.19271  | 788.36724  | 789.37507  | 395.19117  | 394.68726  | 787.35942  | 394.18335  | 7  |
| 21 | 2178.84207 | 1089.92467 | 2195.86862 | 1098.43795 | D           | 688.35120  | 344.67924  | 673.34030  | 674.34812  | 337.67770  | 337.17379  | 672.33247  | 336.66987  | 6  |
| 22 | 2265.87409 | 1133.44069 | 2282.90064 | 1141.95396 | S           | 573.32425  | 287.16576  | 558.31335  | 559.32118  | 280.16423  | 279.66032  | 557.30553  | 279.15640  | 5  |
| 23 | 2378.95816 | 1189.98272 | 2395.98471 | 1198.49599 | L           | 486.29223  | 243.64975  | 471.28133  | 472.28915  | 236.64821  | 236.14430  | 470.27350  | 235.64039  | 4  |
| 24 | 2476.01092 | 1238.50910 | 2493.03747 | 1247.02237 | P           | 373.20816  | 187.10772  | 358.19726  | 359.20509  | 180.10618  | 179.60227  | 357.18944  | 179.09836  | 3  |
| 25 | 2605.05352 | 1303.03040 | 2622.08006 | 1311.54367 | E           | 276.15540  | 138.58134  | 261.14450  | 262.15232  | 131.57989  | 131.07589  | 260.13667  | 130.57197  | 2  |
| 26 |            |            |            |            | K           | 147.11280  | 74.06004   | 132.10191  | 133.10973  | 67.05850   | 66.55459   | 131.09408  | 66.05068   | 1  |

# Ser261

Sequence: GGDPGDEMGLVLESPVSPDDSLPEKADGTVNSPR, S18-Phospho (79.96633 Da)

Charge: +3, Monoisotopic m/z: 1211.53455 Da (-1.83 mmu/-1.51 ppm), MH+: 3632.58908 Da,

RT: 55.0002 min, Identified with: Sequest HT (v1.17); XCorr:6.50,

ptmRS: Best Site Probabilities:S18(Phospho): 99.99, Fragment match tolerance used for search: 0.02 Da

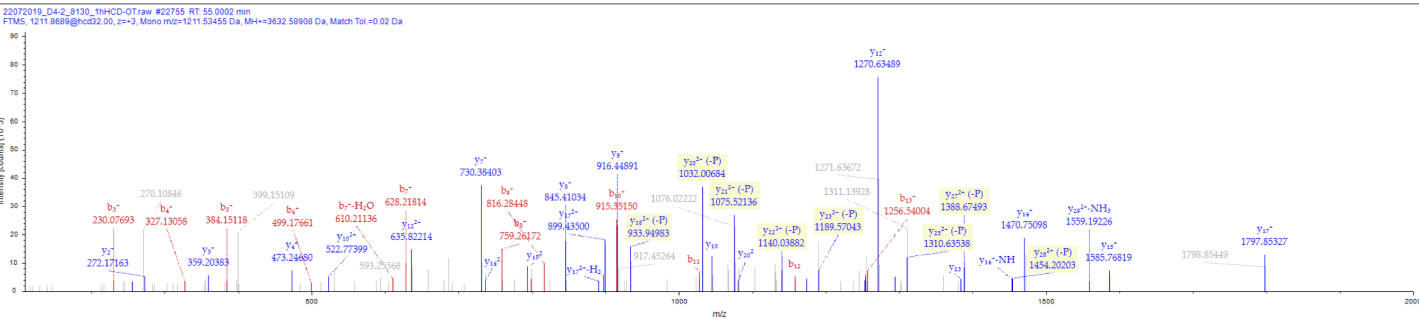

| #1 | b <sup>+</sup> | b <sup>2+</sup> | b <sup>3+</sup> | Seq.      | y <sup>+</sup> | y <sup>2+</sup> | y <sup>3+</sup> | #2 |
|----|----------------|-----------------|-----------------|-----------|----------------|-----------------|-----------------|----|
| 1  | 58.02874       | 29.51801        | 20.01443        | G         |                |                 |                 | 35 |
| 2  | 115.05020      | 58.02874        | 39.02159        | G         | 3575.57311     | 1788.29019      | 1192.52922      | 34 |
| 3  | 230.07715      | 115.54221       | 77.36390        | D         | 3518.55164     | 1759.77946      | 1173.52207      | 33 |
| 4  | 327.12991      | 164.06859       | 109.71482       | P         | 3403.52470     | 1702.26599      | 1135.17975      | 32 |
| 5  | 384.15137      | 192.57933       | 128.72198       | G         | 3306.47194     | 1653.73961      | 1102.82883      | 31 |
| 6  | 499.17832      | 250.09280       | 167.06429       | D         | 3249.45047     | 1625.22888      | 1083.82168      | 30 |
| 7  | 628.22091      | 314.61409       | 210.07849       | E         | 3134.42353     | 1567.71540      | 1045.47936      | 29 |
| 8  | 759.26139      | 380.13434       | 253.75865       | M         | 3005.38094     | 1503.19411      | 1002.46516      | 28 |
| 9  | 816.28286      | 408.64507       | 272.76580       | G         | 2874.34045     | 1437.67386      | 958.78500       | 27 |
| 10 | 915.35127      | 458.17927       | 305.78861       | V         | 2817.31899     | 1409.16313      | 939.77785       | 26 |
| 11 | 1028.43534     | 514.72131       | 343.48330       | L         | 2718.25058     | 1359.62893      | 906.75504       | 25 |
| 12 | 1157.47793     | 579.24260       | 386.49749       | E         | 2605.16651     | 1303.08689      | 869.06035       | 24 |
| 13 | 1256.54634     | 628.77681       | 419.52030       | V         | 2476.12392     | 1238.56560      | 826.04616       | 23 |
| 14 | 1385.58894     | 693.29811       | 462.53450       | E         | 2377.05550     | 1189.03139      | 793.02335       | 22 |
| 15 | 1472.62096     | 736.81412       | 491.54517       | S         | 2248.01291     | 1124.51009      | 750.00915       | 21 |
| 16 | 1569.67373     | 785.34050       | 523.89609       | P         | 2160.98088     | 1080.99408      | 720.99848       | 20 |
| 17 | 1668.74214     | 834.87471       | 556.91890       | V         | 2063.92812     | 1032.46770      | 688.64756       | 19 |
| 18 | 1835.74050     | 918.37389       | 612.58502       | S-Phospho | 1964.85971     | 982.93349       | 655.62475       | 18 |
| 19 | 1932.79327     | 966.90027       | 644.93594       | P         | 1797.86135     | 899.43431       | 599.95863       | 17 |
| 20 | 2047.82021     | 1024.41374      | 683.27825       | D         | 1700.80858     | 850.90793       | 567.60771       | 16 |
| 21 | 2162.84715     | 1081.92721      | 721.62057       | D         | 1585.78164     | 793.39446       | 529.26540       | 15 |
| 22 | 2249.87918     | 1125.44323      | 750.63124       | S         | 1470.75470     | 735.88099       | 490.92308       | 14 |
| 23 | 2362.96324     | 1181.98526      | 788.32593       | L         | 1383.72267     | 692.36497       | 461.91241       | 13 |
| 24 | 2460.01601     | 1230.51164      | 820.67685       | P         | 1270.63860     | 635.82294       | 424.21772       | 12 |
| 25 | 2589.05860     | 1295.03294      | 863.69105       | E         | 1173.58584     | 587.29656       | 391.86680       | 11 |
| 26 | 2717.15356     | 1359.08042      | 906.38937       | K         | 1044.54325     | 522.77526       | 348.85260       | 10 |
| 27 | 2788.19068     | 1394.59898      | 930.06841       | A         | 916.44828      | 458.72778       | 306.15428       | 9  |
| 28 | 2903.21762     | 1452.11245      | 968.41072       | D         | 845.41117      | 423.20922       | 282.47524       | 8  |
| 29 | 2960.23908     | 1480.62318      | 987.41788       | G         | 730.38423      | 365.69575       | 244.13293       | 7  |
| 30 | 3061.28676     | 1531.14702      | 1021.10044      | T         | 673.36276      | 337.18502       | 225.12577       | 6  |
| 31 | 3160.35518     | 1580.68123      | 1054.12324      | V         | 572.31509      | 286.66118       | 191.44321       | 5  |
| 32 | 3274.39810     | 1637.70269      | 1092.13755      | N         | 473.24667      | 237.12697       | 158.42041       | 4  |
| 33 | 3361.43013     | 1681.21870      | 1121.14823      | S         | 359.20374      | 180.10551       | 120.40610       | 3  |
| 34 | 3458.48290     | 1729.74509      | 1153.49915      | P         | 272.17172      | 136.58950       | 91.39542        | 2  |
| 35 |                |                 |                 | R         | 175.11895      | 88.06311        | 59.04450        | 1  |

# Ser276

Sequence: ADGTVNSPR, S7-Phospho (79.96633 Da)

Charge: +2, Monoisotopic m/z: 498.70993 Da (-1.02 mmu/-2.04 ppm), MH+: 996.41258 Da,

RT: 19.8079 min, Identified with: Sequest HT (v1.17); XCorr:3.10,

ptmRS: Best Site Probabilities:S7(Phospho): 100, Fragment match tolerance used for search: 0.02 Da

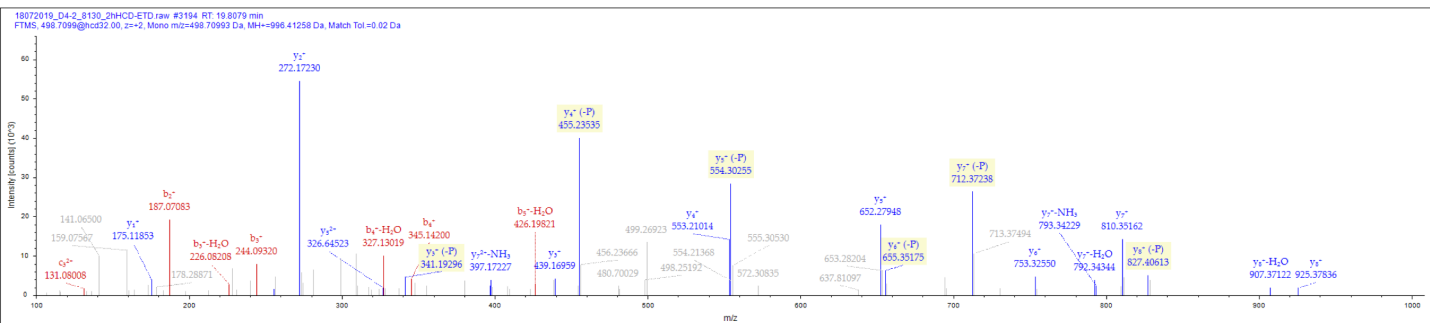

| #1 | b+        | b <sup>2+</sup> | c <sup>+</sup> | c <sup>2+</sup> | Seq.      | y <sup>+</sup> | y <sup>2+</sup> | z <sup>+</sup> | z+H <sup>+</sup> | z+H <sup>2+</sup> | z <sup>2+</sup> | z-H <sup>+</sup> | z-H <sup>2+</sup> | #2 |
|----|-----------|-----------------|----------------|-----------------|-----------|----------------|-----------------|----------------|------------------|-------------------|-----------------|------------------|-------------------|----|
| 1  | 72.04439  | 36.52583        | 89.07094       | 45.03911        | A         |                |                 |                |                  |                   |                 |                  |                   | 9  |
| 2  | 187.07133 | 94.03930        | 204.09788      | 102.55258       | D         | 925.37750      | 463.19239       | 910.36660      | 911.37443        | 456.19085         | 455.68694       | 909.35878        | 455.18303         | 8  |
| 3  | 244.09280 | 122.55004       | 261.11935      | 131.06331       | G         | 810.35056      | 405.67892       | 795.33966      | 796.34748        | 398.67738         | 398.17347       | 794.33183        | 397.66956         | 7  |
| 4  | 345.14048 | 173.07388       | 362.16702      | 181.58715       | T         | 753.32910      | 377.16819       | 738.31820      | 739.32602        | 370.16665         | 369.66274       | 737.31037        | 369.15882         | 6  |
| 5  | 444.20889 | 222.60808       | 461.23544      | 231.12136       | V         | 652.28142      | 326.64435       | 637.27052      | 638.27834        | 319.64281         | 319.13890       | 636.26269        | 318.63498         | 5  |
| 6  | 558.25182 | 279.62955       | 575.27837      | 288.14282       | N         | 553.21300      | 277.11014       | 538.20210      | 539.20993        | 270.10860         | 269.60469       | 537.19428        | 269.10078         | 4  |
| 7  | 725.25018 | 363.12873       | 742.27673      | 371.64200       | S-Phospho | 439.17008      | 220.08868       | 424.15918      | 425.16700        | 213.08714         | 212.58323       | 423.15135        | 212.07931         | 3  |
| 8  | 822.30294 | 411.65511       | 839.32949      | 420.16838       | P         | 272.17172      | 136.58950       | 257.16082      | 258.16864        | 129.58796         | 129.08405       | 256.15299        | 128.58013         | 2  |
| 9  |           |                 |                |                 | R         | 175.11895      | 88.06311        | 160.10805      | 161.11588        | 81.06158          | 80.55766        | 159.10023        | 80.05375          | 1  |

# Ser324

Sequence: CSSVTGVMQK, C1-Carbamidomethyl (57.02146 Da), S3-heavyPhospho (85.96631 Da)  
 Charge: +2, Monoisotopic m/z: 591.74811 Da (+5.05 mmu/+8.53 ppm), MH+: 1182.48894 Da,  
 RT: 41.5046 min, Identified with: Sequest HT (v1.17); XCorr:2.32,  
 ptmRS: Best Site Probabilities:S3(heavyPhospho): 100, Fragment match tolerance used for search: 0.02 Da

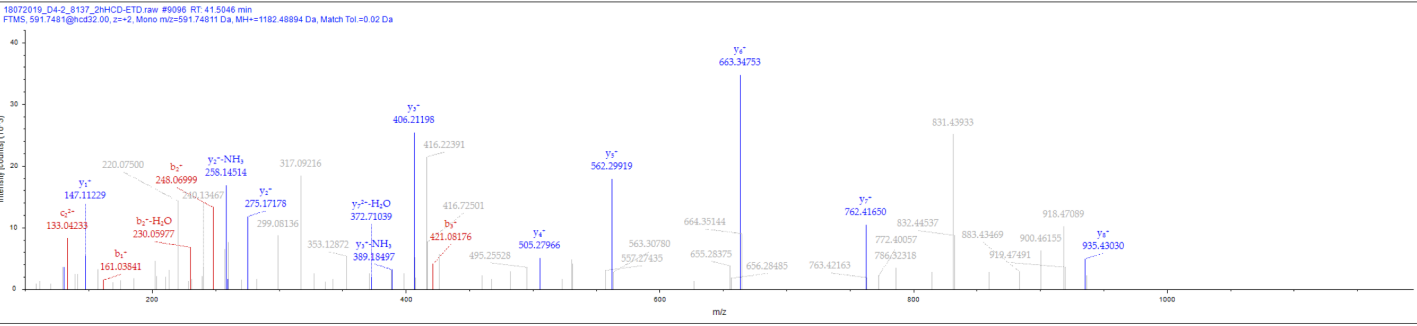

| #1 | b <sup>+</sup> | b <sup>2+</sup> | c <sup>+</sup> | c <sup>2+</sup> | Seq.         | y <sup>+</sup> | y <sup>2+</sup> | z <sup>+</sup> | z+H <sup>+</sup> | z+H <sup>2+</sup> | z <sup>2+</sup> | z-H <sup>+</sup> | z-H <sup>2+</sup> | #2 |
|----|----------------|-----------------|----------------|-----------------|--------------|----------------|-----------------|----------------|------------------|-------------------|-----------------|------------------|-------------------|----|
| 1  | 161.03793      | 81.02260        | 178.06447      | 89.53588        | C-Carbami... |                |                 |                |                  |                   |                 |                  |                   | 10 |
| 2  | 248.06995      | 124.53862       | 265.09650      | 133.05189       | S            | 1022.44820     | 511.72774       | 1007.43730     | 1008.44513       | 504.72620         | 504.22229       | 1006.42948       | 503.71838         | 9  |
| 3  | 421.06829      | 211.03778       | 438.09484      | 219.55106       | S-heavyPh... | 935.41617      | 468.21173       | 920.40528      | 921.41310        | 461.21019         | 460.70628       | 919.39745        | 460.20236         | 8  |
| 4  | 520.13671      | 260.57199       | 537.16325      | 269.08527       | V            | 762.41784      | 381.71256       | 747.40694      | 748.41476        | 374.71102         | 374.20711       | 746.39911        | 373.70319         | 7  |
| 5  | 621.18438      | 311.09583       | 638.21093      | 319.60910       | T            | 663.34942      | 332.17835       | 648.33852      | 649.34635        | 325.17681         | 324.67290       | 647.33070        | 324.16899         | 6  |
| 6  | 678.20585      | 339.60656       | 695.23240      | 348.11984       | G            | 562.30174      | 281.65451       | 547.29084      | 548.29867        | 274.65297         | 274.14906       | 546.28302        | 273.64515         | 5  |
| 7  | 777.27426      | 389.14077       | 794.30081      | 397.65404       | V            | 505.28028      | 253.14378       | 490.26938      | 491.27721        | 246.14224         | 245.63833       | 489.26156        | 245.13442         | 4  |
| 8  | 908.31475      | 454.66101       | 925.34130      | 463.17429       | M            | 406.21187      | 203.60957       | 391.20097      | 392.20879        | 196.60803         | 196.10412       | 390.19314        | 195.60021         | 3  |
| 9  | 1036.37332     | 518.69030       | 1053.39987     | 527.20357       | Q            | 275.17138      | 138.08933       | 260.16048      | 261.16831        | 131.08779         | 130.58388       | 259.15266        | 130.07997         | 2  |
| 10 |                |                 |                |                 | K            | 147.11280      | 74.06004        | 132.10191      | 133.10973        | 67.05850          | 66.55459        | 131.09408        | 66.05068          | 1  |

# Ser348

Sequence: HASAPSHVQPSDSEKNR, S3-heavyPhospho (85.96631 Da)

Charge: +4, Monoisotopic m/z: 483.96932 Da (+2.53 mmu/+5.22 ppm), MH+: 1932.85546 Da,

RT: 42.2567 min, Identified with: Sequest HT (v1.17); XCorr:2.81,

ptmRS: Best Site Probabilities:S3(heavyPhospho): 100,Fragment match tolerance used for search: 0.02 Da

09062020\_Nano1\_uPA030\_0180\_AMPK\_2h\_DDA\_HCD-ETD.raw #8784 RT: 42.2567 min  
 FTMS: 483.96932@MS3 2.1, z=+4, Mono m/z=483.96932 Da, MH+=1932.85546 Da, Match Tol.=0.02 Da

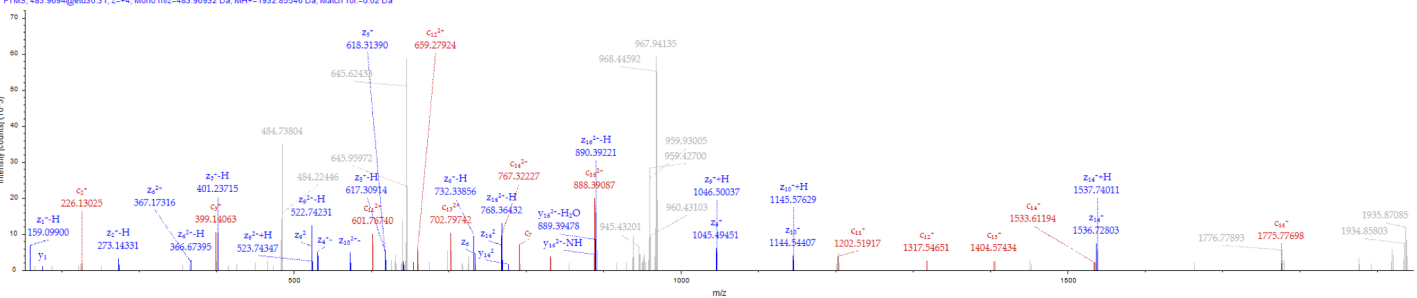

| #1 | b*         | b+*       | b3*       | c*         | c2*       | c3*       | Seq.        | y*         | y+*       | y3*       | z*         | z+*        | z+H*      | z+H2*     | z2*       | z3*       | z+H*       | z+H2*     | #2        |    |
|----|------------|-----------|-----------|------------|-----------|-----------|-------------|------------|-----------|-----------|------------|------------|-----------|-----------|-----------|-----------|------------|-----------|-----------|----|
| 1  | 138.06619  | 69.53673  | 46.68368  | 155.09274  | 78.05001  | 52.36910  | H           |            |           |           |            |            |           |           |           |           |            |           |           | 17 |
| 2  | 209.10330  | 105.05629 | 70.37262  | 226.12865  | 113.56856 | 76.04813  | A           | 1795.79646 | 899.39687 | 599.26700 | 1780.77556 | 1781.78339 | 891.38533 | 594.59931 | 890.89142 | 594.26337 | 1779.76774 | 890.38751 | 593.92743 | 16 |
| 3  | 382.10164  | 191.55446 | 128.03873 | 399.12819  | 200.06773 | 133.71425 | S-heavy Ph. | 1724.74935 | 862.87831 | 575.58797 | 1709.73845 | 1710.74627 | 855.87677 | 570.92028 | 855.37286 | 570.58433 | 1708.73062 | 854.86895 | 570.24839 | 15 |
| 4  | 453.13875  | 227.07302 | 151.71777 | 470.16530  | 235.58629 | 157.38329 | A           | 1451.75101 | 776.37914 | 517.92185 | 1536.74011 | 1537.74793 | 769.37161 | 513.25416 | 768.87369 | 512.91822 | 1535.73228 | 768.36978 | 512.58228 | 14 |
| 5  | 550.19152  | 275.59940 | 184.06869 | 567.21807  | 284.11267 | 189.74421 | P           | 1480.71389 | 740.86059 | 494.24282 | 1465.70300 | 1466.71082 | 733.85905 | 489.57512 | 733.35514 | 489.23918 | 1464.69517 | 732.85122 | 488.90324 | 13 |
| 6  | 637.22355  | 319.11541 | 213.07937 | 654.25010  | 327.62869 | 218.75488 | S           | 1383.66113 | 692.33420 | 461.89189 | 1368.65023 | 1369.65806 | 685.33267 | 457.22420 | 684.82875 | 456.88826 | 1367.64241 | 684.32484 | 456.55232 | 12 |
| 7  | 774.28246  | 387.64487 | 258.76567 | 791.30901  | 396.15814 | 264.44119 | H           | 1296.62910 | 648.81819 | 432.88122 | 1281.61820 | 1282.62603 | 641.81665 | 428.21353 | 641.31274 | 427.87759 | 1280.61038 | 640.80883 | 427.54164 | 11 |
| 8  | 873.35087  | 437.17907 | 291.78848 | 890.37742  | 445.69235 | 297.46399 | V           | 1159.57019 | 580.28873 | 387.19491 | 1144.55929 | 1145.56712 | 573.28720 | 382.52722 | 572.78328 | 382.19128 | 1143.55147 | 572.27937 | 381.85534 | 10 |
| 9  | 1001.40945 | 501.20336 | 334.47467 | 1019.43600 | 509.72164 | 340.15018 | Q           | 1060.50178 | 530.75453 | 354.17211 | 1045.48083 | 1046.48870 | 523.75299 | 349.50442 | 523.24968 | 349.16948 | 1044.48305 | 522.74516 | 348.83254 | 9  |
| 10 | 1098.46221 | 549.73475 | 366.82559 | 1115.48876 | 559.24802 | 372.50111 | P           | 932.44320  | 466.72524 | 311.48592 | 917.43330  | 918.44013  | 459.72370 | 306.81823 | 459.21979 | 306.48228 | 916.42448  | 458.71588 | 306.14634 | 8  |
| 11 | 1185.49424 | 593.25076 | 395.83626 | 1202.52079 | 601.76403 | 401.51178 | S           | 835.39044  | 418.19886 | 279.13500 | 820.37954  | 821.38736  | 411.19732 | 274.46730 | 410.69341 | 274.13136 | 819.37171  | 410.18949 | 273.79542 | 7  |
| 12 | 1300.52118 | 650.76423 | 434.17858 | 1317.54773 | 659.27751 | 439.85410 | D           | 748.35641  | 374.68284 | 250.12432 | 733.34751  | 734.35533  | 367.68130 | 245.45663 | 367.17739 | 245.12069 | 732.33968  | 366.67348 | 244.78475 | 6  |
| 13 | 1387.55321 | 694.28024 | 463.18926 | 1404.57976 | 702.79352 | 468.86477 | S           | 633.33146  | 317.16937 | 211.78201 | 618.32056  | 619.32839  | 310.16783 | 207.11431 | 309.66392 | 206.77837 | 617.31274  | 309.16001 | 206.44243 | 5  |
| 14 | 1516.59581 | 758.80154 | 506.20345 | 1533.62236 | 767.31482 | 511.87897 | E           | 546.29944  | 273.65336 | 182.77133 | 531.28854  | 532.29636  | 266.65182 | 178.10364 | 266.14791 | 177.76770 | 530.28071  | 265.64399 | 177.43175 | 4  |
| 15 | 1644.69077 | 822.84902 | 548.90177 | 1661.71732 | 831.36230 | 554.57729 | K           | 417.25684  | 209.13206 | 139.75713 | 402.24594  | 403.25377  | 202.13052 | 136.08944 | 201.62661 | 134.75350 | 401.23812  | 201.12270 | 134.41756 | 3  |
| 16 | 1758.73370 | 879.87049 | 588.91608 | 1775.76025 | 888.38376 | 592.59160 | N           | 289.16188  | 145.08458 | 97.05881  | 274.10098  | 275.10881  | 138.08304 | 92.39112  | 137.57913 | 92.05518  | 273.14316  | 137.07522 | 91.71924  | 2  |
| 17 |            |           |           |            |           |           | R           | 175.11895  | 88.06311  | 59.04450  | 160.10805  | 161.11588  | 81.06158  | 54.37581  | 80.55766  | 54.04087  | 159.10023  | 80.05375  | 53.70493  | 1  |

**Ser377**

Sequence: FEINLISPDTK, S7-Phospho (79.96633 Da)

Charge: +2, Monoisotopic m/z: 678.82422 Da (-1.76 mmu/-2.59 ppm), MH+: 1356.64116 Da,

RT: 87.7573 min, Identified with: Sequest HT (v1.17); XCorr:2.55,

ptmRS: Best Site Probabilities:S7(Phospho): 100, Fragment match tolerance used for search: 0.02 Da

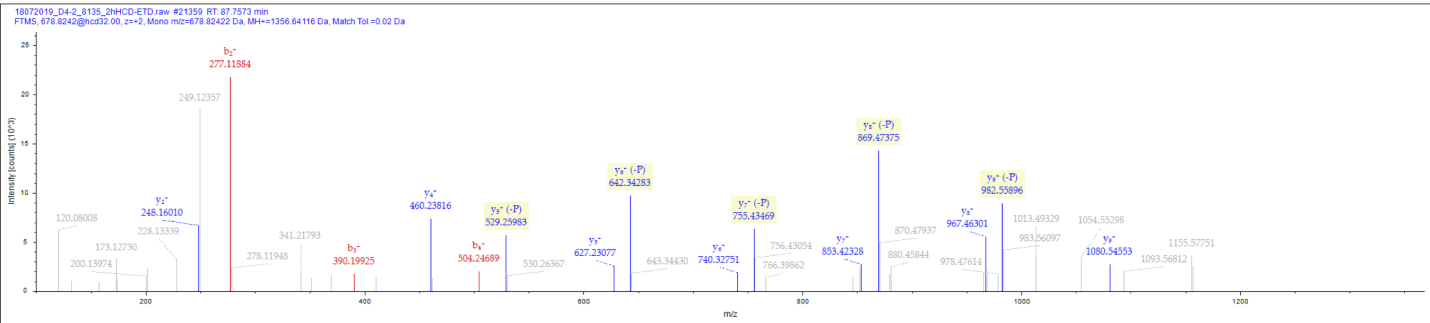

| #1 | b <sup>+</sup> | b <sup>2+</sup> | c <sup>+</sup> | c <sup>2+</sup> | Seq.      | y <sup>+</sup> | y <sup>2+</sup> | z <sup>+</sup> | z+H <sup>+</sup> | z+H <sup>2+</sup> | z <sup>2+</sup> | z-H <sup>+</sup> | z-H <sup>2+</sup> | #2 |
|----|----------------|-----------------|----------------|-----------------|-----------|----------------|-----------------|----------------|------------------|-------------------|-----------------|------------------|-------------------|----|
| 1  | 148.07569      | 74.54148        | 165.10224      | 83.05476        | F         |                |                 |                |                  |                   |                 |                  |                   | 11 |
| 2  | 277.11828      | 139.06278       | 294.14483      | 147.57605       | E         | 1209.57626     | 605.29177       | 1194.56536     | 1195.57319       | 598.29023         | 597.78632       | 1193.55754       | 597.28241         | 10 |
| 3  | 390.20235      | 195.60481       | 407.22890      | 204.11809       | I         | 1080.53367     | 540.77047       | 1065.52277     | 1066.53059       | 533.76894         | 533.26502       | 1064.51494       | 532.76111         | 9  |
| 4  | 504.24527      | 252.62628       | 521.27182      | 261.13955       | N         | 967.44960      | 484.22844       | 952.43870      | 953.44653        | 477.22690         | 476.72299       | 951.43088        | 476.21908         | 8  |
| 5  | 617.32934      | 309.16831       | 634.35589      | 317.68158       | L         | 853.40668      | 427.20698       | 838.39578      | 839.40360        | 420.20544         | 419.70153       | 837.38795        | 419.19761         | 7  |
| 6  | 730.41340      | 365.71034       | 747.43995      | 374.22361       | I         | 740.32261      | 370.66494       | 725.31171      | 726.31954        | 363.66341         | 363.15950       | 724.30389        | 362.65558         | 6  |
| 7  | 897.41176      | 449.20952       | 914.43831      | 457.72279       | S-Phospho | 627.23855      | 314.12291       | 612.22765      | 613.23547        | 307.12138         | 306.61746       | 611.21982        | 306.11355         | 5  |
| 8  | 994.46453      | 497.73590       | 1011.49107     | 506.24918       | P         | 460.24019      | 230.62373       | 445.22929      | 446.23712        | 223.62220         | 223.11828       | 444.22147        | 222.61437         | 4  |
| 9  | 1109.49147     | 555.24937       | 1126.51802     | 563.76265       | D         | 363.18743      | 182.09735       | 348.17653      | 349.18435        | 175.09581         | 174.59190       | 347.16870        | 174.08799         | 3  |
| 10 | 1210.53915     | 605.77321       | 1227.56570     | 614.28649       | T         | 248.16048      | 124.58388       | 233.14958      | 234.15741        | 117.58234         | 117.07843       | 232.14176        | 116.57452         | 2  |
| 11 |                |                 |                |                 | K         | 147.11280      | 74.06004        | 132.10191      | 133.10973        | 67.05850          | 66.55459        | 131.09408        | 66.05068          | 1  |

# Ser492

Sequence: HLSSLTDNEQADIFER, S3-Phospho (79.96633 Da)

Charge: +2, Monoisotopic m/z: 977.92963 Da (-1.13 mmu/-1.15 ppm), MH+: 1954.85198 Da,

RT: 74.2388 min, Identified with: Sequest HT (v1.17); XCorr:3.64,

ptmRS: Best Site Probabilities:S3(Phospho): 100, Fragment match tolerance used for search: 0.02 Da

25042019\_D4-1\_7849\_2HHCD-ETD raw #18103 RT: 74.2388 min  
FTMS: 878.4236@ms2: 0.0, z=+2, Mono m/z=977.92963 Da, MH+=1954.85198 Da, Match Tol=0.02 Da

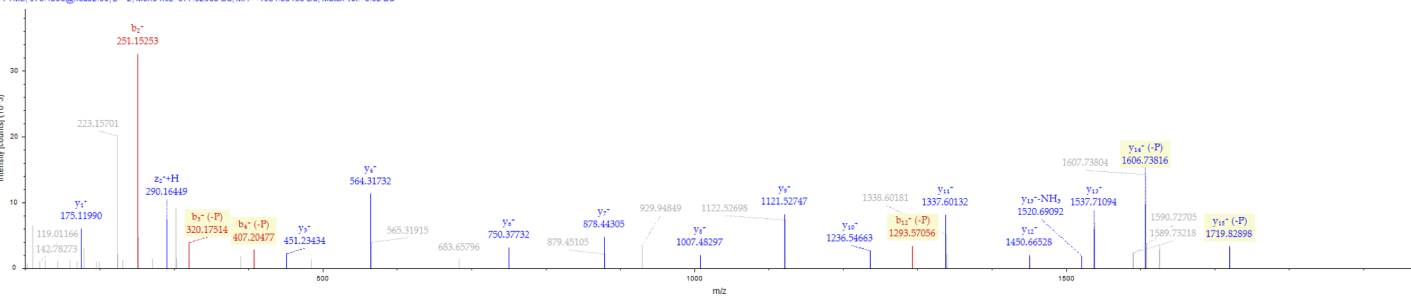

| #1 | b <sup>+</sup> | b <sup>2+</sup> | c <sup>+</sup> | c <sup>2+</sup> | Seq.      | y <sup>+</sup> | y <sup>2+</sup> | z <sup>+</sup> | z+H <sup>+</sup> | z+H <sup>2+</sup> | z <sup>2+</sup> | z-H <sup>+</sup> | z-H <sup>2+</sup> | #2 |
|----|----------------|-----------------|----------------|-----------------|-----------|----------------|-----------------|----------------|------------------|-------------------|-----------------|------------------|-------------------|----|
| 1  | 138.06619      | 69.53673        | 155.09274      | 78.05001        | H         |                |                 |                |                  |                   |                 |                  |                   | 16 |
| 2  | 251.15025      | 126.07876       | 268.17680      | 134.59204       | L         | 1817.79531     | 909.40130       | 1802.78442     | 1803.79224       | 902.39976         | 901.89585       | 1801.77659       | 901.39193         | 15 |
| 3  | 418.14861      | 209.57794       | 435.17516      | 218.09122       | S-Phospho | 1704.71125     | 852.85926       | 1689.70035     | 1690.70818       | 845.85773         | 845.35381       | 1688.69253       | 844.84990         | 14 |
| 4  | 505.18064      | 253.09396       | 522.20719      | 261.60723       | S         | 1537.71289     | 769.36008       | 1522.70199     | 1523.70982       | 762.35855         | 761.85463       | 1521.69417       | 761.35072         | 13 |
| 5  | 618.26470      | 309.63599       | 635.29125      | 318.14926       | L         | 1450.68086     | 725.84407       | 1435.66996     | 1436.67779       | 718.84253         | 718.33862       | 1434.66214       | 717.83471         | 12 |
| 6  | 719.31238      | 360.15983       | 736.33893      | 368.67310       | T         | 1337.59680     | 669.30204       | 1322.58590     | 1323.59372       | 662.30050         | 661.79659       | 1321.57807       | 661.29268         | 11 |
| 7  | 834.33933      | 417.67330       | 851.36587      | 426.18658       | D         | 1236.54912     | 618.77820       | 1221.53822     | 1222.54605       | 611.77666         | 611.27275       | 1220.53040       | 610.76884         | 10 |
| 8  | 948.38225      | 474.69476       | 965.40880      | 483.20804       | N         | 1121.52218     | 561.26473       | 1106.51128     | 1107.51910       | 554.26319         | 553.75928       | 1105.50345       | 553.25537         | 9  |
| 9  | 1077.42485     | 539.21606       | 1094.45139     | 547.72934       | E         | 1007.47925     | 504.24326       | 992.46835      | 993.47618        | 497.24173         | 496.73781       | 991.46053        | 496.23390         | 8  |
| 10 | 1205.48342     | 603.24535       | 1222.50997     | 611.75862       | Q         | 878.43666      | 439.72197       | 863.42576      | 864.43358        | 432.72043         | 432.21652       | 862.41793        | 431.71260         | 7  |
| 11 | 1276.52054     | 638.76391       | 1293.54709     | 647.27718       | A         | 750.37808      | 375.69268       | 735.36718      | 736.37501        | 368.69114         | 368.18723       | 734.35936        | 367.68332         | 6  |
| 12 | 1391.54748     | 696.27738       | 1408.57403     | 704.79065       | D         | 679.34097      | 340.17412       | 664.33007      | 665.33789        | 333.17258         | 332.66867       | 663.32224        | 332.16476         | 5  |
| 13 | 1504.63154     | 752.81941       | 1521.65809     | 761.33268       | I         | 564.31402      | 282.66065       | 549.30312      | 550.31095        | 275.65911         | 275.15520       | 548.29530        | 274.65129         | 4  |
| 14 | 1651.69996     | 826.35362       | 1668.72651     | 834.86689       | F         | 451.22996      | 226.11862       | 436.21906      | 437.22689        | 219.11708         | 218.61317       | 435.21124        | 218.10926         | 3  |
| 15 | 1780.74255     | 890.87491       | 1797.76910     | 899.38819       | E         | 304.16155      | 152.58441       | 289.15065      | 290.15847        | 145.58287         | 145.07896       | 288.14282        | 144.57505         | 2  |
| 16 |                |                 |                |                 | R         | 175.11895      | 88.06311        | 160.10805      | 161.11588        | 81.06158          | 80.55766        | 159.10023        | 80.05375          | 1  |



# Ser577

Sequence: SLTSSLENIFSR, S5-heavyPhospho (85.96631 Da)

Charge: +2, Monoisotopic m/z: 720.34387 Da (+6.65 mmu/+9.23 ppm), MH+: 1439.68047 Da,

RT: 100.6558 min, Identified with: Sequest HT (v1.17); XCorr:2.25,

ptmRS: Best Site Probabilities:S5(heavyPhospho): 99.65, Fragment match tolerance used for search: 0.02 Da

25042019\_D4-1\_7854\_2hHCD-ETD raw #24854 RT: 100.6558 min  
FTMS: 720.34387@ms2.00, z=+2, Mono m/z=720.34387 Da, MH+=1439.68047 Da, Match Tol=0.02 Da

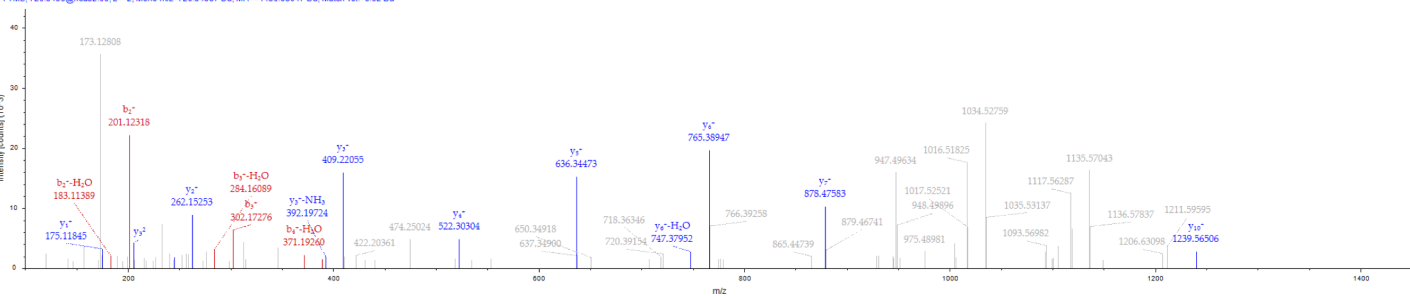

| #1 | b <sup>+</sup> | b <sup>2+</sup> | c <sup>+</sup> | c <sup>2+</sup> | Seq.         | y <sup>+</sup> | y <sup>2+</sup> | z <sup>+</sup> | z+H <sup>+</sup> | z+H <sup>2+</sup> | z <sup>2+</sup> | z-H <sup>+</sup> | z-H <sup>2+</sup> | #2 |
|----|----------------|-----------------|----------------|-----------------|--------------|----------------|-----------------|----------------|------------------|-------------------|-----------------|------------------|-------------------|----|
| 1  | 88.03930       | 44.52329        | 105.06585      | 53.03657        | S            |                |                 |                |                  |                   |                 |                  |                   | 12 |
| 2  | 201.12337      | 101.06532       | 218.14992      | 109.57860       | L            | 1352.63515     | 676.82121       | 1337.62425     | 1338.63208       | 669.81968         | 669.31576       | 1336.61643       | 668.81185         | 11 |
| 3  | 302.17105      | 151.58916       | 319.19760      | 160.10244       | T            | 1239.55109     | 620.27918       | 1224.54019     | 1225.54801       | 613.27765         | 612.77373       | 1223.53236       | 612.26982         | 10 |
| 4  | 389.20308      | 195.10518       | 406.22962      | 203.61845       | S            | 1138.50341     | 569.75534       | 1123.49251     | 1124.50034       | 562.75381         | 562.24989       | 1122.48469       | 561.74598         | 9  |
| 5  | 562.20141      | 281.60435       | 579.22796      | 290.11762       | S-heavyPh... | 1051.47138     | 526.23933       | 1036.46048     | 1037.46831       | 519.23779         | 518.73388       | 1035.45266       | 518.22997         | 8  |
| 6  | 675.28548      | 338.14638       | 692.31203      | 346.65965       | L            | 878.47304      | 439.74016       | 863.46214      | 864.46997        | 432.73862         | 432.23471       | 862.45432        | 431.73080         | 7  |
| 7  | 804.32807      | 402.66767       | 821.35462      | 411.18095       | E            | 765.38898      | 383.19813       | 750.37808      | 751.38590        | 376.19659         | 375.69268       | 749.37025        | 375.18877         | 6  |
| 8  | 918.37100      | 459.68914       | 935.39755      | 468.20241       | N            | 636.34639      | 318.67683       | 621.33549      | 622.34331        | 311.67529         | 311.17138       | 620.32766        | 310.66747         | 5  |
| 9  | 1031.45506     | 516.23117       | 1048.48161     | 524.74444       | I            | 522.30346      | 261.65537       | 507.29256      | 508.30038        | 254.65383         | 254.14992       | 506.28473        | 253.64601         | 4  |
| 10 | 1178.52348     | 589.76538       | 1195.55003     | 598.27865       | F            | 409.21939      | 205.11334       | 394.20850      | 395.21632        | 198.11180         | 197.60789       | 393.20067        | 197.10397         | 3  |
| 11 | 1265.55550     | 633.28139       | 1282.58205     | 641.79467       | S            | 262.15098      | 131.57913       | 247.14008      | 248.14791        | 124.57759         | 124.07368       | 246.13226        | 123.56977         | 2  |
| 12 |                |                 |                |                 | R            | 175.11895      | 88.06311        | 160.10805      | 161.11588        | 81.06158          | 80.55766        | 159.10023        | 80.05375          | 1  |

# Ser595

Sequence: GRLGSMDSFER, S5-heavyPhospho (85.96631 Da)

Charge: +3, Monoisotopic m/z: 447.52725 Da (+3.79 mmu/+8.46 ppm), MH+: 1340.56720 Da,

RT: 53.8501 min, Identified with: Sequest HT (v1.17); XCorr:2.80,

ptmRS: Best Site Probabilities:S5(heavyPhospho): 100, Fragment match tolerance used for search: 0.02 Da

25042019\_D4-1\_7854\_2hHCD-ETD raw #12459 RT 53.8501 min  
FTMS: 447.52725@447.52725 Da, Mono m/z=447.52725 Da, MH+=1340.56720 Da, Match Tol.=0.02 Da

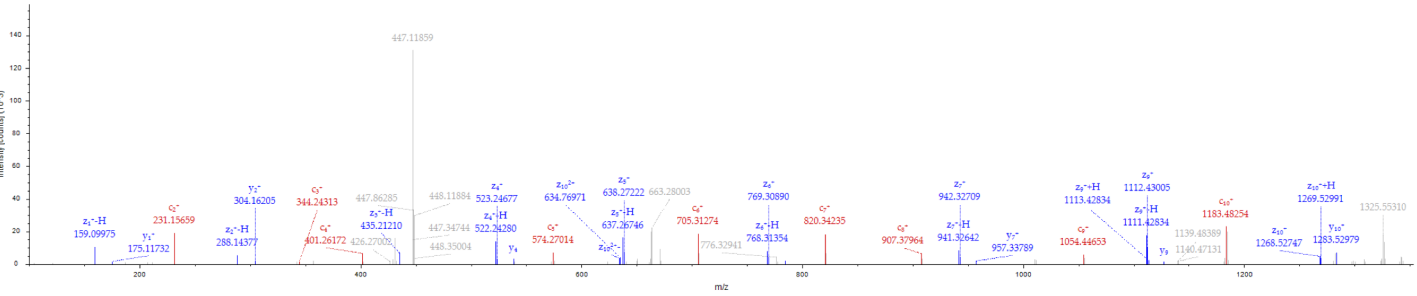

| #1 | b <sup>+</sup> | b <sup>2+</sup> | c <sup>+</sup> | c <sup>2+</sup> | Seq.      | y <sup>+</sup> | y <sup>2+</sup> | z <sup>+</sup> | z+H <sup>+</sup> | z+H <sup>2+</sup> | z <sup>2+</sup> | z-H <sup>+</sup> | z-H <sup>2+</sup> | #2 |
|----|----------------|-----------------|----------------|-----------------|-----------|----------------|-----------------|----------------|------------------|-------------------|-----------------|------------------|-------------------|----|
| 1  | 58.02874       | 29.51801        | 75.05529       | 38.03128        | G         |                |                 |                |                  |                   |                 |                  |                   | 11 |
| 2  | 214.12985      | 107.56856       | 231.15640      | 116.08184       | R         | 1283.53439     | 642.27083       | 1268.52349     | 1269.53132       | 635.26930         | 634.76538       | 1267.51567       | 634.26147         | 10 |
| 3  | 327.21392      | 164.11060       | 344.24046      | 172.62387       | L         | 1127.43328     | 564.22028       | 1112.42238     | 1113.43021       | 557.21874         | 556.71483       | 1111.41456       | 556.21092         | 9  |
| 4  | 384.23538      | 192.62133       | 401.26193      | 201.13460       | G         | 1014.34922     | 507.67825       | 999.33832      | 1000.34614       | 500.67671         | 500.17280       | 998.33049        | 499.66888         | 8  |
| 5  | 557.23372      | 279.12050       | 574.26027      | 287.63377       | S-heavyPh | 957.32775      | 479.16751       | 942.31685      | 943.32468        | 472.16598         | 471.66207       | 941.30903        | 471.15815         | 7  |
| 6  | 688.27420      | 344.64074       | 705.30075      | 353.15401       | M         | 784.32942      | 392.66835       | 769.31852      | 770.32634        | 385.66681         | 385.16290       | 768.31069        | 384.65898         | 6  |
| 7  | 803.30114      | 402.15421       | 820.32769      | 410.66749       | D         | 653.28893      | 327.14810       | 638.27803      | 639.28586        | 320.14657         | 319.64265       | 637.27021        | 319.13874         | 5  |
| 8  | 890.33317      | 445.67022       | 907.35972      | 454.18350       | S         | 538.26199      | 269.63463       | 523.25109      | 524.25891        | 262.63310         | 262.12918       | 522.24326        | 261.62527         | 4  |
| 9  | 1037.40159     | 519.20443       | 1054.42814     | 527.71771       | F         | 451.22996      | 226.11862       | 436.21906      | 437.22689        | 219.11708         | 218.61317       | 435.21124        | 218.10926         | 3  |
| 10 | 1166.44418     | 583.72573       | 1183.47073     | 592.23900       | E         | 304.16155      | 152.58441       | 289.15065      | 290.15847        | 145.58287         | 145.07896       | 288.14282        | 144.57505         | 2  |
| 11 |                |                 |                |                 | R         | 175.11895      | 88.06311        | 160.10805      | 161.11588        | 81.06158          | 80.55766        | 159.10023        | 80.05375          | 1  |

# Ser598

Sequence: LGSMDSEFR, S6-Phospho (79.96633 Da)

Charge: +2, Monoisotopic m/z: 561.21924 Da (-1.05 mmu/-1.87 ppm), MH+: 1121.43120 Da,

RT: 63.1517 min, Identified with: Sequest HT (v1.17); XCorr:3.13,

ptmRS: Best Site Probabilities:S6(Phospho): 100, Fragment match tolerance used for search: 0.02 Da

25042019\_D4-1\_7843\_2hHCD-ETD raw #15129 RT: 63.1517 min  
FTMS, S6-12192@hcd22.00, z=+2, Mono m/z=561.21924 Da, MH+=1121.43120 Da, Match Tol=0.02 Da

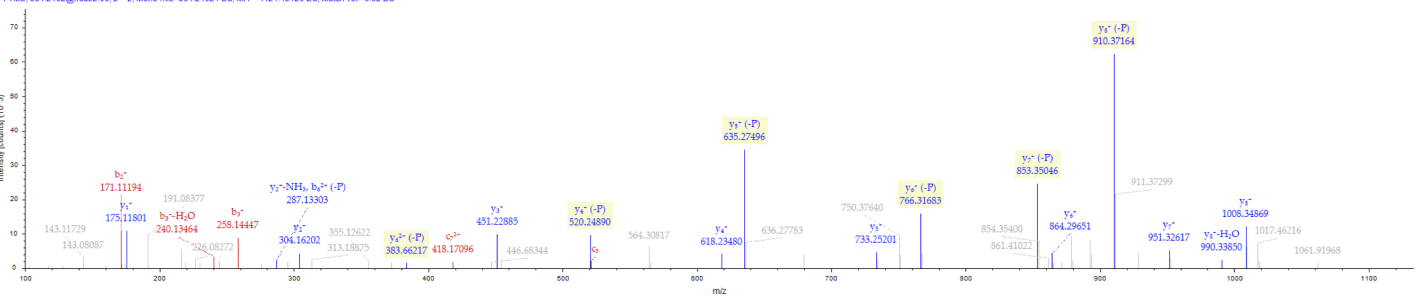

| #1 | b <sup>+</sup> | b <sup>2+</sup> | c <sup>+</sup> | c <sup>2+</sup> | Seq.      | y <sup>+</sup> | y <sup>2+</sup> | z <sup>+</sup> | z+H <sup>+</sup> | z+H <sup>2+</sup> | z <sup>2+</sup> | z-H <sup>+</sup> | z-H <sup>2+</sup> | #2 |
|----|----------------|-----------------|----------------|-----------------|-----------|----------------|-----------------|----------------|------------------|-------------------|-----------------|------------------|-------------------|----|
| 1  | 114.09134      | 57.54931        | 131.11789      | 66.06258        | L         |                |                 |                |                  |                   |                 |                  |                   | 9  |
| 2  | 171.11280      | 86.06004        | 188.13935      | 94.57331        | G         | 1008.34924     | 504.67826       | 993.33834      | 994.34616        | 497.67672         | 497.17281       | 992.33051        | 496.66890         | 8  |
| 3  | 258.14483      | 129.57605       | 275.17138      | 138.08933       | S         | 951.32777      | 476.16753       | 936.31688      | 937.32470        | 469.16599         | 468.66208       | 935.30905        | 468.15816         | 7  |
| 4  | 389.18532      | 195.09630       | 406.21187      | 203.60957       | M         | 864.29575      | 432.65151       | 849.28485      | 850.29267        | 425.64997         | 425.14606       | 848.27702        | 424.64215         | 6  |
| 5  | 504.21226      | 252.60977       | 521.23881      | 261.12304       | D         | 733.25526      | 367.13127       | 718.24436      | 719.25219        | 360.12973         | 359.62582       | 717.23654        | 359.12191         | 5  |
| 6  | 671.21062      | 336.10895       | 688.23717      | 344.62222       | S-Phospho | 618.22832      | 309.61780       | 603.21742      | 604.22524        | 302.61626         | 302.11235       | 602.20959        | 301.60844         | 4  |
| 7  | 818.27903      | 409.64315       | 835.30558      | 418.15643       | F         | 451.22996      | 226.11862       | 436.21906      | 437.22689        | 219.11708         | 218.61317       | 435.21124        | 218.10926         | 3  |
| 8  | 947.32163      | 474.16445       | 964.34818      | 482.67773       | E         | 304.16155      | 152.58441       | 289.15065      | 290.15847        | 145.58287         | 145.07896       | 288.14282        | 144.57505         | 2  |
| 9  |                |                 |                |                 | R         | 175.11895      | 88.06311        | 160.10805      | 161.11588        | 81.06158          | 80.55766        | 159.10023        | 80.05375          | 1  |

# Thr649

Sequence: AHTFSHPPSSSR, T3-heavyPhospho (85.96631 Da)

Charge: +3, Monoisotopic m/z: 466.20529 Da (+3.8 mmu/+8.15 ppm), MH+: 1396.60132 Da,

RT: 20.2793 min, Identified with: Sequest HT (v1.17); XCorr:3.51,

ptmRS: Best Site Probabilities:T3(heavyPhospho): 100, Fragment match tolerance used for search: 0.02 Da

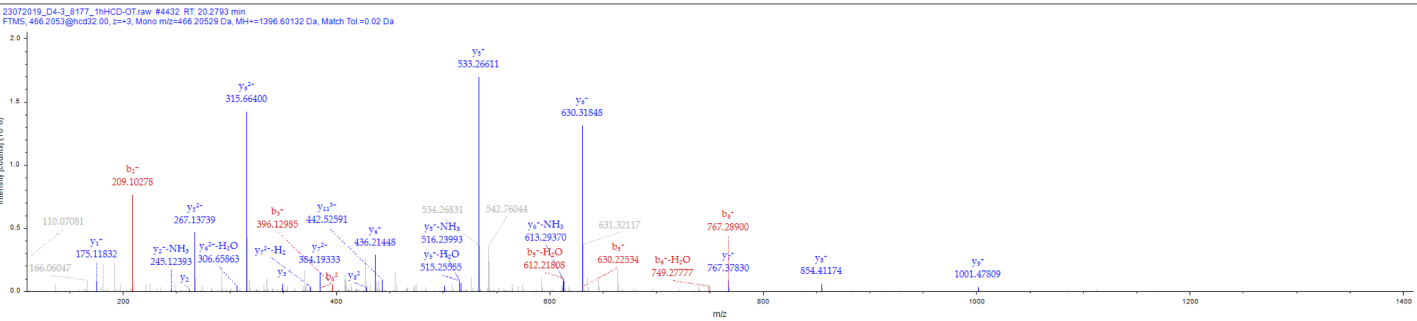

| #1 | b+         | b2+       | b3+       | Seq.         | y+         | y2+       | y3+       | #2 |
|----|------------|-----------|-----------|--------------|------------|-----------|-----------|----|
| 1  | 72.04439   | 36.52583  | 24.68631  | A            |            |           |           | 12 |
| 2  | 209.10330  | 105.05529 | 70.37262  | H            | 1325.55282 | 663.28005 | 442.52246 | 11 |
| 3  | 396.11729  | 198.56228 | 132.71061 | T-heavyPh... | 1188.49391 | 594.75059 | 396.83615 | 10 |
| 4  | 543.18570  | 272.09649 | 181.73342 | F            | 1001.47992 | 501.24360 | 334.49816 | 9  |
| 5  | 630.21773  | 315.61250 | 210.74410 | S            | 854.41151  | 427.70939 | 285.47535 | 8  |
| 6  | 767.27664  | 384.14196 | 256.43040 | H            | 767.37948  | 384.19338 | 256.46468 | 7  |
| 7  | 864.32941  | 432.66834 | 288.78132 | P            | 630.32056  | 315.66392 | 210.77837 | 6  |
| 8  | 961.38217  | 481.19472 | 321.13224 | P            | 533.26780  | 267.13754 | 178.42745 | 5  |
| 9  | 1048.41420 | 524.71074 | 350.14292 | S            | 436.21504  | 218.61116 | 146.07653 | 4  |
| 10 | 1135.44623 | 568.22675 | 379.15359 | S            | 349.18301  | 175.09514 | 117.06585 | 3  |
| 11 | 1222.47826 | 611.74277 | 408.16427 | S            | 262.15098  | 131.57913 | 88.05518  | 2  |
| 12 |            |           |           | R            | 175.11895  | 88.06311  | 59.04450  | 1  |

# Ser673

Sequence: AHGLRSPLLR, S6-Phospho (79.96633 Da)

Charge: +3, Monoisotopic m/z: 400.55106 Da (-0.75 mmu/-1.88 ppm), MH+: 1199.63861 Da,

RT: 36.4646 min, Identified with: Sequest HT (v1.17); XCorr:3.63,

ptmRS: Best Site Probabilities:S6(Phospho): 100, Fragment match tolerance used for search: 0.02 Da

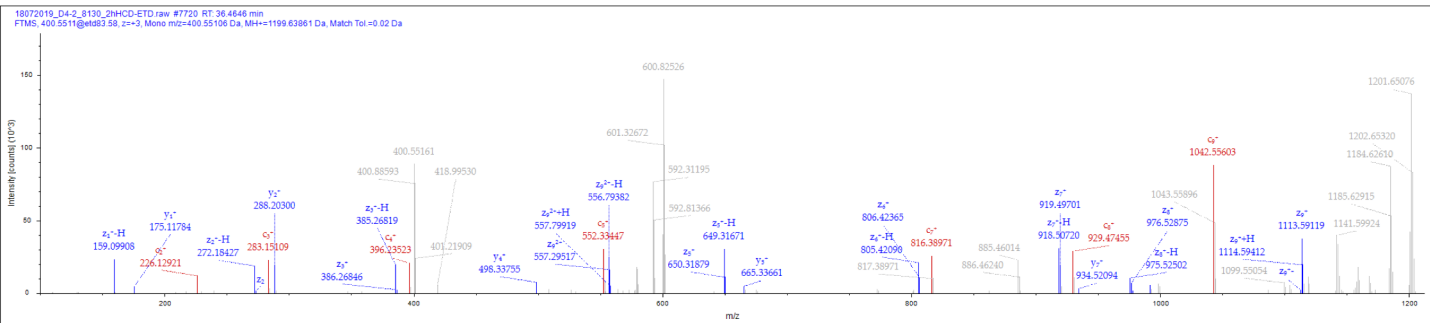

| #1 | b <sup>+</sup> | b <sup>2+</sup> | c <sup>+</sup> | c <sup>2+</sup> | Seq.      | y <sup>+</sup> | y <sup>2+</sup> | z <sup>+</sup> | z+H <sup>+</sup> | z+H <sup>2+</sup> | z <sup>2+</sup> | z-H <sup>+</sup> | z-H <sup>2+</sup> | #2 |
|----|----------------|-----------------|----------------|-----------------|-----------|----------------|-----------------|----------------|------------------|-------------------|-----------------|------------------|-------------------|----|
| 1  | 72.04439       | 36.52583        | 89.07094       | 45.03911        | A         |                |                 |                |                  |                   |                 |                  |                   | 10 |
| 2  | 209.10330      | 105.05529       | 226.12985      | 113.56856       | H         | 1128.60375     | 564.80552       | 1113.59285     | 1114.60068       | 557.80398         | 557.30007       | 1112.58503       | 556.79615         | 9  |
| 3  | 266.12477      | 133.56602       | 283.15131      | 142.07930       | G         | 991.54484      | 496.27606       | 976.53394      | 977.54177        | 489.27452         | 488.77061       | 975.52612        | 488.26670         | 8  |
| 4  | 379.20883      | 190.10805       | 396.23538      | 198.62133       | L         | 934.52338      | 467.76533       | 919.51248      | 920.52030        | 460.76379         | 460.25988       | 918.50465        | 459.75597         | 7  |
| 5  | 535.30994      | 268.15861       | 552.33649      | 276.67188       | R         | 821.43931      | 411.22330       | 806.42842      | 807.43624        | 404.22176         | 403.71785       | 805.42059        | 403.21393         | 6  |
| 6  | 702.30830      | 351.65779       | 719.33485      | 360.17106       | S-Phospho | 665.33820      | 333.17274       | 650.32730      | 651.33513        | 326.17120         | 325.66729       | 649.31948        | 325.16338         | 5  |
| 7  | 799.36106      | 400.18417       | 816.38761      | 408.69744       | P         | 498.33984      | 249.67356       | 483.32894      | 484.33677        | 242.67202         | 242.16811       | 482.32112        | 241.66420         | 4  |
| 8  | 912.44513      | 456.72620       | 929.47168      | 465.23948       | L         | 401.28708      | 201.14718       | 386.27618      | 387.28401        | 194.14564         | 193.64173       | 385.26836        | 193.13782         | 3  |
| 9  | 1025.52919     | 513.26823       | 1042.55574     | 521.78151       | L         | 288.20302      | 144.60515       | 273.19212      | 274.19994        | 137.60361         | 137.09970       | 272.18429        | 136.59578         | 2  |
| 10 |                |                 |                |                 | R         | 175.11895      | 88.06311        | 160.10805      | 161.11588        | 81.06158          | 80.55766        | 159.10023        | 80.05375          | 1  |

# Ser680

Sequence: QSSSEQSIVPSAR, C7-Carbamidomethyl (57.02146 Da), S3-Phospho (79.96633 Da)  
 Charge: +2, Monoisotopic m/z: 808.34064 Da (-2.09 mmu/-2.59 ppm), MH+: 1615.67400 Da,  
 RT: 49.9933 min, Identified with: Sequest HT (v1.17); XCorr: 3.61,  
 ptmRS: Best Site Probabilities: S3(Phospho): 100, Fragment match tolerance used for search: 0.02 Da

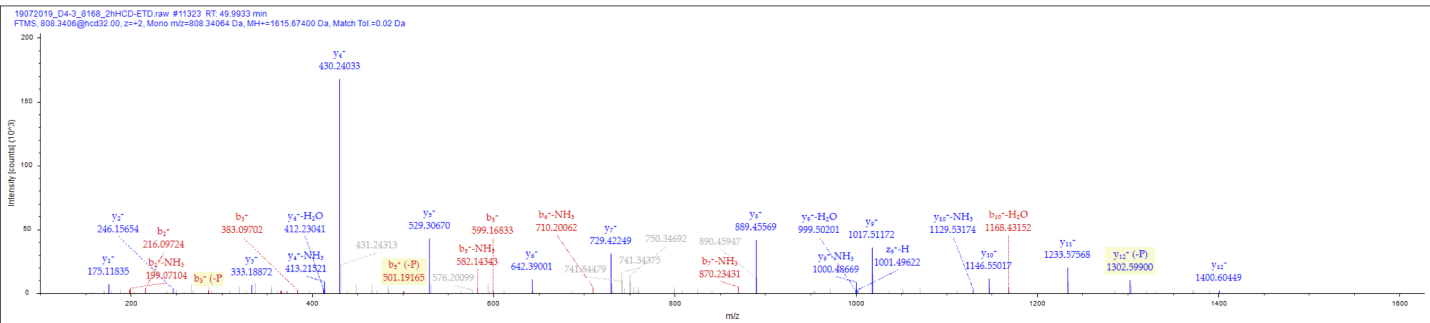

| #1 | b <sup>+</sup> | b <sup>2+</sup> | c <sup>+</sup> | c <sup>2+</sup> | Seq.      | y <sup>+</sup> | y <sup>2+</sup> | z <sup>+</sup> | z+H <sup>+</sup> | z+H <sup>2+</sup> | z <sup>2+</sup> | z-H <sup>+</sup> | z-H <sup>2+</sup> | #2 |
|----|----------------|-----------------|----------------|-----------------|-----------|----------------|-----------------|----------------|------------------|-------------------|-----------------|------------------|-------------------|----|
| 1  | 129.06585      | 65.03657        | 146.09240      | 73.54984        | Q         |                |                 |                |                  |                   |                 |                  |                   | 14 |
| 2  | 216.09788      | 108.55258       | 233.12443      | 117.06585       | S         | 1487.61960     | 744.31344       | 1472.60870     | 1473.61653       | 737.31190         | 736.80799       | 1471.60088       | 736.30408         | 13 |
| 3  | 383.09624      | 192.05176       | 400.12279      | 200.56503       | S-Phospho | 1400.58757     | 700.79742       | 1385.57667     | 1386.58450       | 693.79589         | 693.29197       | 1384.56885       | 692.78806         | 12 |
| 4  | 470.12827      | 235.56777       | 487.15482      | 244.08105       | S         | 1233.58921     | 617.29824       | 1218.57831     | 1219.58614       | 610.29671         | 609.79279       | 1217.57049       | 609.28888         | 11 |
| 5  | 599.17086      | 300.08907       | 616.19741      | 308.60234       | E         | 1146.55718     | 573.78223       | 1131.54628     | 1132.55411       | 566.78069         | 566.27678       | 1130.53846       | 565.77287         | 10 |
| 6  | 727.22944      | 364.11836       | 744.25599      | 372.63163       | Q         | 1017.51459     | 509.26093       | 1002.50369     | 1003.51152       | 502.25940         | 501.75548       | 1001.49587       | 501.25157         | 9  |
| 7  | 887.26009      | 444.13368       | 904.28664      | 452.64696       | C-Carbami | 889.45601      | 445.23164       | 874.44511      | 875.45294        | 438.23011         | 437.72620       | 873.43729        | 437.22228         | 8  |
| 8  | 974.29212      | 487.64970       | 991.31867      | 496.16297       | S         | 729.42536      | 365.21632       | 714.41447      | 715.42229        | 358.21478         | 357.71087       | 713.40664        | 357.20696         | 7  |
| 9  | 1087.37618     | 544.19173       | 1104.40273     | 552.70500       | I         | 642.39334      | 321.70031       | 627.38244      | 628.39026        | 314.69877         | 314.19486       | 626.37461        | 313.69094         | 6  |
| 10 | 1186.44460     | 593.72594       | 1203.47114     | 602.23921       | V         | 529.30927      | 265.15827       | 514.29837      | 515.30620        | 258.15674         | 257.65282       | 513.29055        | 257.14891         | 5  |
| 11 | 1283.49736     | 642.25232       | 1300.52391     | 650.76559       | P         | 430.24086      | 215.62407       | 415.22996      | 416.23778        | 208.62253         | 208.11862       | 414.22213        | 207.61471         | 4  |
| 12 | 1370.52939     | 685.76833       | 1387.55594     | 694.28161       | S         | 333.18809      | 167.09769       | 318.17720      | 319.18502        | 160.09615         | 159.59224       | 317.16937        | 159.08832         | 3  |
| 13 | 1441.56650     | 721.28689       | 1458.59305     | 729.80016       | A         | 246.15607      | 123.58167       | 231.14517      | 232.15299        | 116.58013         | 116.07622       | 230.13734        | 115.57231         | 2  |
| 14 |                |                 |                |                 | R         | 175.11895      | 88.06311        | 160.10805      | 161.11588        | 81.06158          | 80.55766        | 159.10023        | 80.05375          | 1  |

# Ser711

Sequence: ESNSSCSLPSLHTSFSAPSFTAPSFLK, C6-Carbamidomethyl (57.02146 Da), S16-heavyPhospho (85.96631 Da)

Charge: +3, Monoisotopic m/z: 991.45068 Da (+3.25 mmu/+3.28 ppm), MH+: 2972.33750 Da,

RT: 61.9515 min, Identified with: Sequest HT (v1.17); XCorr:2.61,

ptmRS: Best Site Probabilities:S16(heavyPhospho): 99.28, Fragment match tolerance used for search: 0.02 Da

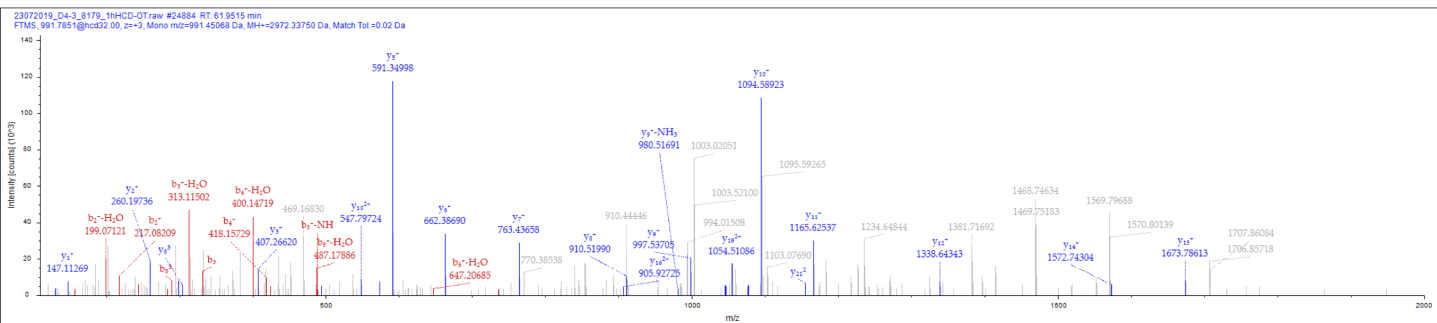

| #1 | b+         | b2+        | b3+       | Seq.         | y+         | y2+        | y3+       | #2 |
|----|------------|------------|-----------|--------------|------------|------------|-----------|----|
| 1  | 130.04987  | 65.52857   | 44.02147  | E            |            |            |           | 27 |
| 2  | 217.08190  | 109.04459  | 73.03215  | S            | 2843.28517 | 1422.14622 | 948.43324 | 26 |
| 3  | 331.12483  | 166.06605  | 111.04646 | N            | 2756.25314 | 1378.63021 | 919.42256 | 25 |
| 4  | 418.15685  | 209.58207  | 140.05714 | S            | 2642.21021 | 1321.60874 | 881.40825 | 24 |
| 5  | 505.18888  | 253.09808  | 169.06781 | S            | 2555.17818 | 1278.09273 | 852.39758 | 23 |
| 6  | 665.21953  | 333.11340  | 222.41136 | C-Carbami... | 2468.14615 | 1234.57672 | 823.38690 | 22 |
| 7  | 752.25156  | 376.62942  | 251.42204 | S            | 2308.11551 | 1154.56139 | 770.04335 | 21 |
| 8  | 865.33562  | 433.17145  | 289.11673 | L            | 2221.08348 | 1111.04538 | 741.03268 | 20 |
| 9  | 962.38839  | 481.69783  | 321.46765 | P            | 2107.99941 | 1054.50334 | 703.33799 | 19 |
| 10 | 1049.42041 | 525.21385  | 350.47832 | S            | 2010.94665 | 1005.97696 | 670.98707 | 18 |
| 11 | 1162.50448 | 581.75588  | 388.17301 | L            | 1923.91462 | 962.46095  | 641.97639 | 17 |
| 12 | 1299.56339 | 650.28533  | 433.85931 | H            | 1810.83056 | 905.91892  | 604.28170 | 16 |
| 13 | 1400.61107 | 700.80917  | 467.54187 | T            | 1673.77165 | 837.38946  | 558.59540 | 15 |
| 14 | 1487.64310 | 744.32519  | 496.55255 | S            | 1572.72397 | 786.86562  | 524.91284 | 14 |
| 15 | 1634.71151 | 817.85939  | 545.57535 | F            | 1485.69194 | 743.34961  | 495.90216 | 13 |
| 16 | 1807.70985 | 904.35856  | 603.24147 | S-heavyPh... | 1338.62352 | 669.81540  | 446.87936 | 12 |
| 17 | 1878.74696 | 939.87712  | 626.92051 | A            | 1165.62519 | 583.31623  | 389.21325 | 11 |
| 18 | 1975.79973 | 988.40350  | 659.27143 | P            | 1094.58807 | 547.79767  | 365.53421 | 10 |
| 19 | 2062.83176 | 1031.91952 | 688.28210 | S            | 997.53531  | 499.27129  | 333.18329 | 9  |
| 20 | 2209.90017 | 1105.45372 | 737.30491 | F            | 910.50328  | 455.75528  | 304.17261 | 8  |
| 21 | 2310.94785 | 1155.97756 | 770.98747 | T            | 763.43487  | 382.22107  | 255.14981 | 7  |
| 22 | 2381.98496 | 1191.49612 | 794.66650 | A            | 662.38719  | 331.69723  | 221.46725 | 6  |
| 23 | 2479.03773 | 1240.02250 | 827.01743 | P            | 591.35007  | 296.17868  | 197.78821 | 5  |
| 24 | 2566.06975 | 1283.53852 | 856.02810 | S            | 494.29731  | 247.65229  | 165.43729 | 4  |
| 25 | 2713.13817 | 1357.07272 | 905.05091 | F            | 407.26528  | 204.13628  | 136.42661 | 3  |
| 26 | 2826.22223 | 1413.61475 | 942.74559 | L            | 260.19687  | 130.60207  | 87.40381  | 2  |
| 27 |            |            |           | K            | 147.11280  | 74.06004   | 49.70912  | 1  |

# Ser761

Sequence: RTSSTCSNESLNAGGTPVTPR, C6-Carbamidomethyl (57.02146 Da), S7-Phospho (79.96633 Da)  
 Charge: +3, Monoisotopic m/z: 758.00494 Da (-0.7 mmu/-0.92 ppm), MH+: 2272.00028 Da,  
 RT: 30.8200 min, Identified with: Sequest HT (v1.17); XCorr:5.88,  
 ptmRS: Best Site Probabilities:S7(Phospho): 100, Fragment match tolerance used for search: 0.02 Da

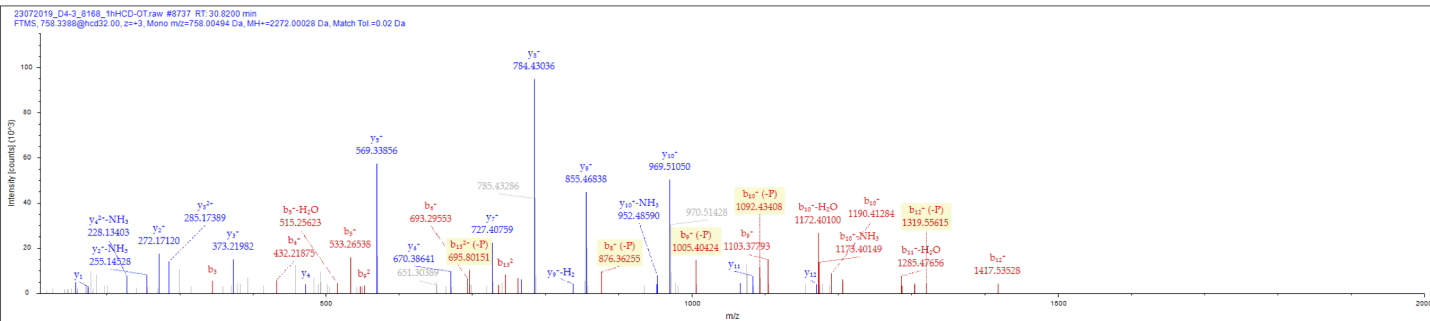

| #1 | b <sup>+</sup> | b <sup>2+</sup> | b <sup>3+</sup> | Seq.         | y <sup>+</sup> | y <sup>2+</sup> | y <sup>3+</sup> | #2 |
|----|----------------|-----------------|-----------------|--------------|----------------|-----------------|-----------------|----|
| 1  | 157.10839      | 79.05783        | 53.04098        | R            |                |                 |                 | 21 |
| 2  | 258.15607      | 129.58167       | 86.72354        | T            | 2115.90125     | 1058.45426      | 705.97194       | 20 |
| 3  | 345.18809      | 173.09769       | 115.73422       | S            | 2014.85357     | 1007.93043      | 672.28938       | 19 |
| 4  | 432.22012      | 216.61370       | 144.74489       | S            | 1927.82155     | 964.41441       | 643.27870       | 18 |
| 5  | 533.26780      | 267.13754       | 178.42745       | T            | 1840.78952     | 920.89840       | 614.26802       | 17 |
| 6  | 693.29845      | 347.15286       | 231.77100       | C-Carbami... | 1739.74184     | 870.37456       | 580.58546       | 16 |
| 7  | 860.29681      | 430.65204       | 287.43712       | S-Phospho    | 1579.71119     | 790.35923       | 527.24191       | 15 |
| 8  | 974.33974      | 487.67351       | 325.45143       | N            | 1412.71283     | 706.86005       | 471.57580       | 14 |
| 9  | 1103.38233     | 552.19480       | 368.46563       | E            | 1298.66990     | 649.83859       | 433.56149       | 13 |
| 10 | 1190.41436     | 595.71082       | 397.47630       | S            | 1169.62731     | 585.31729       | 390.54729       | 12 |
| 11 | 1303.49842     | 652.25285       | 435.17099       | L            | 1082.59528     | 541.80128       | 361.53661       | 11 |
| 12 | 1417.54135     | 709.27431       | 473.18530       | N            | 969.51122      | 485.25925       | 323.84192       | 10 |
| 13 | 1488.57846     | 744.79287       | 496.86434       | A            | 855.46829      | 428.23778       | 285.82761       | 9  |
| 14 | 1545.59993     | 773.30360       | 515.87149       | G            | 784.43118      | 392.71923       | 262.14858       | 8  |
| 15 | 1602.62139     | 801.81433       | 534.87865       | G            | 727.40971      | 364.20850       | 243.14142       | 7  |
| 16 | 1703.66907     | 852.33817       | 568.56121       | T            | 670.38825      | 335.69776       | 224.13427       | 6  |
| 17 | 1800.72183     | 900.86455       | 600.91213       | P            | 569.34057      | 285.17392       | 190.45171       | 5  |
| 18 | 1899.79025     | 950.39876       | 633.93493       | V            | 472.28781      | 236.64754       | 158.10079       | 4  |
| 19 | 2000.83792     | 1000.92260      | 667.61749       | T            | 373.21939      | 187.11334       | 125.07798       | 3  |
| 20 | 2097.89069     | 1049.44898      | 699.96841       | P            | 272.17172      | 136.58950       | 91.39542        | 2  |
| 21 |                |                 |                 | R            | 175.11895      | 88.06311        | 59.04450        | 1  |



# Ser764

Sequence: RTSSTCSNESLNAGGTPVTPR, C6-Carbamidomethyl (57.02146 Da), S7-Phospho (79.96633 Da), S10-heavyPhospho (85.96631 Da)

Charge: +2, Monoisotopic m/z: 1179.49472 Da (+6.75 mmu/+5.72 ppm), MH+: 2357.98217 Da,

RT: 53.4554 min, Identified with: Sequest HT (v1.17); XCorr:2.06,

ptmRS: Best Site Probabilities:S7(Phospho): 96.6; S10(heavyPhospho): 99.06, Fragment match tolerance used for search: 0.02 Da

08062020\_Nano1\_gPAC50\_9149\_AMPK\_2h\_DDA\_HCD-ETD raw #12347 RT: 53.4554 min

FTMS: 1179.4944@ms2.00, z=+2, Mono m/z=1179.49472 Da, MH+=2357.98217 Da, Match Tol=+0.02 Da

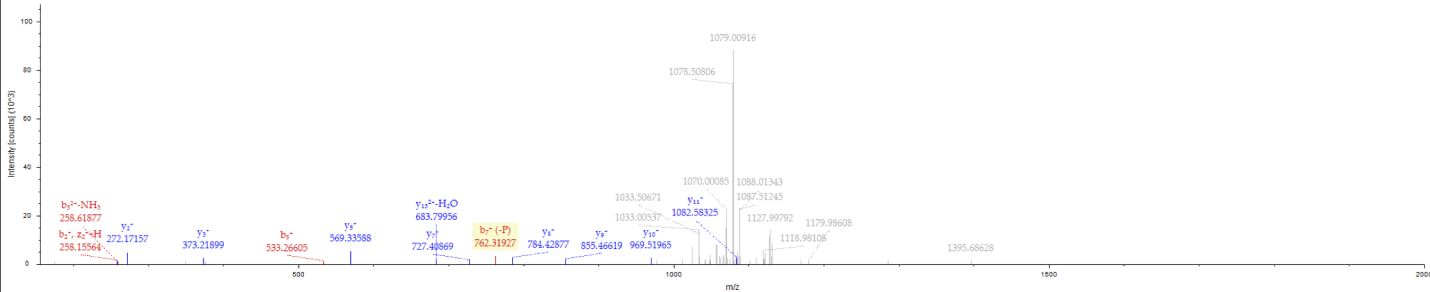

| #1 | b <sup>+</sup> | b <sup>2+</sup> | c <sup>+</sup> | c <sup>2+</sup> | Seq.         | y <sup>+</sup> | y <sup>2+</sup> | z <sup>+</sup> | z+H <sup>+</sup> | z+H <sup>2+</sup> | z <sup>2+</sup> | z-H <sup>+</sup> | z-H <sup>2+</sup> | #2 |
|----|----------------|-----------------|----------------|-----------------|--------------|----------------|-----------------|----------------|------------------|-------------------|-----------------|------------------|-------------------|----|
| 1  | 157.10839      | 79.05783        | 174.13494      | 87.57111        | R            |                |                 |                |                  |                   |                 |                  |                   | 21 |
| 2  | 258.15607      | 129.58167       | 275.18262      | 138.09495       | T            | 2201.86756     | 1101.43742      | 2186.85666     | 2187.86449       | 1094.43588        | 1093.93197      | 2185.84884       | 1093.42806        | 20 |
| 3  | 345.18809      | 173.09769       | 362.21464      | 181.61096       | S            | 2100.81988     | 1050.91358      | 2085.80899     | 2086.81681       | 1043.91204        | 1043.40813      | 2084.80116       | 1042.90422        | 19 |
| 4  | 432.22012      | 216.61370       | 449.24667      | 225.12697       | S            | 2013.78786     | 1007.39757      | 1998.77696     | 1999.78478       | 1000.39603        | 999.89212       | 1997.76913       | 999.38820         | 18 |
| 5  | 533.26780      | 267.13754       | 550.29435      | 275.65081       | T            | 1926.75583     | 963.88155       | 1911.74493     | 1912.75275       | 956.88002         | 956.37610       | 1910.73710       | 955.87219         | 17 |
| 6  | 693.29845      | 347.15286       | 710.32500      | 355.66614       | C-Carbami... | 1825.70815     | 913.35771       | 1810.69725     | 1811.70508       | 906.35618         | 905.85226       | 1809.68943       | 905.34835         | 16 |
| 7  | 860.29681      | 430.65204       | 877.32336      | 439.16532       | S-Phospho    | 1665.67750     | 833.34239       | 1650.66660     | 1651.67443       | 826.34085         | 825.83694       | 1649.65878       | 825.33303         | 15 |
| 8  | 974.33974      | 487.67351       | 991.36629      | 496.18678       | N            | 1498.67914     | 749.84321       | 1483.66824     | 1484.67607       | 742.84167         | 742.33776       | 1482.66042       | 741.83385         | 14 |
| 9  | 1103.38233     | 552.19480       | 1120.40888     | 560.70808       | E            | 1394.63621     | 692.82175       | 1369.62532     | 1370.63314       | 685.82021         | 685.31630       | 1368.61749       | 684.81238         | 13 |
| 10 | 1276.38067     | 638.69397       | 1293.40722     | 647.20725       | S-heavyPh... | 1255.59362     | 628.30045       | 1240.58272     | 1241.59055       | 621.29891         | 620.79500       | 1239.57490       | 620.29109         | 12 |
| 11 | 1389.46473     | 695.23600       | 1406.49128     | 703.74928       | L            | 1082.59528     | 541.80128       | 1067.58438     | 1068.59221       | 534.79974         | 534.29583       | 1066.57656       | 533.79192         | 11 |
| 12 | 1503.50766     | 752.25747       | 1520.53421     | 760.77074       | N            | 969.51122      | 485.25925       | 954.50032      | 955.50815        | 478.25771         | 477.75380       | 953.49250        | 477.24989         | 10 |
| 13 | 1574.54477     | 787.77602       | 1591.57132     | 796.28930       | A            | 855.46829      | 428.23778       | 840.45739      | 841.46522        | 421.23625         | 420.73233       | 839.44957        | 420.22842         | 9  |
| 14 | 1631.56624     | 816.28676       | 1648.59279     | 824.80003       | G            | 784.43118      | 392.71923       | 769.42028      | 770.42810        | 385.71769         | 385.21378       | 768.41245        | 384.70987         | 8  |
| 15 | 1688.58770     | 844.79749       | 1705.61425     | 853.31076       | G            | 727.40971      | 364.20850       | 712.39882      | 713.40664        | 357.20696         | 356.70305       | 711.39099        | 356.19913         | 7  |
| 16 | 1789.63538     | 895.32133       | 1806.66193     | 903.83460       | T            | 670.38825      | 335.69776       | 655.37735      | 656.38518        | 328.69623         | 328.19231       | 654.36953        | 327.68840         | 6  |
| 17 | 1886.68814     | 943.84771       | 1903.71469     | 952.36098       | P            | 569.34057      | 285.17392       | 554.32967      | 555.33750        | 278.17239         | 277.66847       | 553.32185        | 277.16456         | 5  |
| 18 | 1985.75656     | 993.38192       | 2002.78311     | 1001.89519      | V            | 472.28781      | 236.64754       | 457.27691      | 458.28473        | 229.64601         | 229.14209       | 456.26908        | 228.63818         | 4  |
| 19 | 2086.80423     | 1043.90576      | 2103.83078     | 1052.41903      | T            | 373.21939      | 187.11334       | 358.20850      | 359.21632        | 180.11180         | 179.60789       | 357.20067        | 179.10397         | 3  |
| 20 | 2183.85700     | 1092.43214      | 2200.88355     | 1100.94541      | P            | 272.17172      | 136.58950       | 257.16082      | 258.16864        | 129.58796         | 129.08405       | 256.15299        | 128.58013         | 2  |
| 21 |                |                 |                |                 | R            | 175.11895      | 88.06311        | 160.10805      | 161.11588        | 81.06158          | 80.55766        | 159.10023        | 80.05375          | 1  |

# Ser789

Sequence: VASPVNK, S3-Phospho (79.96633 Da)

Charge: +2, Monoisotopic m/z: 397.69302 Da (-1.01 mmu/-2.55 ppm), MH+: 794.37877 Da,

RT: 20.4943 min, Identified with: Sequest HT (v1.17); XCorr:2.91,

ptmRS: Best Site Probabilities:S3(Phospho): 100, Fragment match tolerance used for search: 0.02 Da

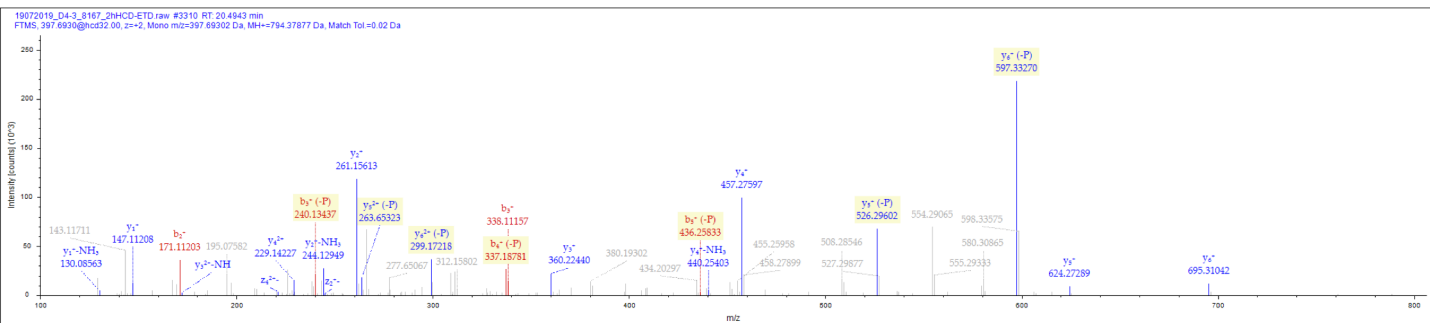

| #1 | b <sup>+</sup> | b <sup>2+</sup> | c <sup>+</sup> | c <sup>2+</sup> | Seq.      | y <sup>+</sup> | y <sup>2+</sup> | z <sup>+</sup> | z+H <sup>+</sup> | z+H <sup>2+</sup> | z <sup>2+</sup> | z-H <sup>+</sup> | z-H <sup>2+</sup> | #2 |
|----|----------------|-----------------|----------------|-----------------|-----------|----------------|-----------------|----------------|------------------|-------------------|-----------------|------------------|-------------------|----|
| 1  | 100.07569      | 50.54148        | 117.10224      | 59.05476        | V         |                |                 |                |                  |                   |                 |                  |                   | 7  |
| 2  | 171.11280      | 86.06004        | 188.13935      | 94.57331        | A         | 695.31238      | 348.15983       | 680.30148      | 681.30931        | 341.15829         | 340.65438       | 679.29366        | 340.15047         | 6  |
| 3  | 338.11116      | 169.55922       | 355.13771      | 178.07249       | S-Phospho | 624.27527      | 312.64127       | 609.26437      | 610.27219        | 305.63974         | 305.13582       | 608.25654        | 304.63191         | 5  |
| 4  | 435.16393      | 218.08560       | 452.19048      | 226.59888       | P         | 457.27691      | 229.14209       | 442.26601      | 443.27384        | 222.14056         | 221.63664       | 441.25819        | 221.13273         | 4  |
| 5  | 534.23234      | 267.61981       | 551.25889      | 276.13308       | V         | 360.22415      | 180.61571       | 345.21325      | 346.22107        | 173.61417         | 173.11026       | 344.20542        | 172.60635         | 3  |
| 6  | 648.27527      | 324.64127       | 665.30182      | 333.15455       | N         | 261.15573      | 131.08150       | 246.14483      | 247.15266        | 124.07997         | 123.57605       | 245.13701        | 123.07214         | 2  |
| 7  |                |                 |                |                 | K         | 147.11280      | 74.06004        | 132.10191      | 133.10973        | 67.05850          | 66.55459        | 131.09408        | 66.05068          | 1  |

# Ser794

Sequence: VASPVNKSPSAMQQQK, S8-Phospho (79.96633 Da)

Charge: +2, Monoisotopic m/z: 890.42554 Da (-1.06 mmu/-1.19 ppm), MH+: 1779.84380 Da,

RT: 33.6538 min, Identified with: Sequest HT (v1.17); XCorr:4.74,

ptmRS: Best Site Probabilities:S8(Phospho): 100, Fragment match tolerance used for search: 0.02 Da

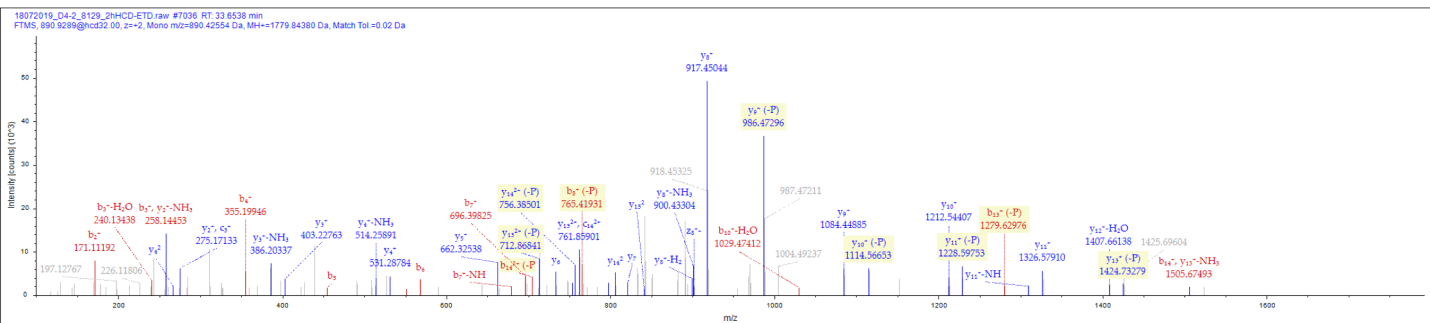

| #1 | b <sup>+</sup> | b <sup>2+</sup> | c <sup>+</sup> | c <sup>2+</sup> | Seq.      | y <sup>+</sup> | y <sup>2+</sup> | z <sup>+</sup> | z+H <sup>+</sup> | z+H <sup>2+</sup> | z <sup>2+</sup> | z-H <sup>+</sup> | z-H <sup>2+</sup> | #2 |
|----|----------------|-----------------|----------------|-----------------|-----------|----------------|-----------------|----------------|------------------|-------------------|-----------------|------------------|-------------------|----|
| 1  | 100.07569      | 50.54148        | 117.10224      | 59.05476        | V         |                |                 |                |                  |                   |                 |                  |                   | 16 |
| 2  | 171.11280      | 86.06004        | 188.13935      | 94.57331        | A         | 1680.77750     | 840.89239       | 1665.76660     | 1666.77442       | 833.89085         | 833.38694       | 1664.75877       | 832.88302         | 15 |
| 3  | 258.14483      | 129.57605       | 275.17138      | 138.08933       | S         | 1609.74038     | 805.37383       | 1594.72948     | 1595.73731       | 798.37229         | 797.86838       | 1593.72166       | 797.36447         | 14 |
| 4  | 358.19760      | 178.10244       | 372.22415      | 186.61571       | P         | 1522.70835     | 761.85782       | 1507.69746     | 1508.70528       | 754.85628         | 754.35237       | 1506.68963       | 753.84845         | 13 |
| 5  | 454.26601      | 227.63664       | 471.29256      | 236.14992       | V         | 1425.65559     | 713.33143       | 1410.64469     | 1411.65252       | 706.32990         | 705.82598       | 1409.63687       | 705.32207         | 12 |
| 6  | 568.30894      | 284.65811       | 585.33549      | 293.17138       | N         | 1326.58718     | 663.79723       | 1311.57628     | 1312.58410       | 656.79569         | 656.29178       | 1310.56845       | 655.78786         | 11 |
| 7  | 696.40390      | 348.70559       | 713.43045      | 357.21886       | K         | 1212.54425     | 606.77576       | 1197.53335     | 1198.54118       | 599.77423         | 599.27031       | 1196.52553       | 598.76640         | 10 |
| 8  | 863.40226      | 432.20477       | 880.42881      | 440.71804       | S-Phospho | 1084.44929     | 542.72828       | 1069.43839     | 1070.44621       | 535.72674         | 535.22283       | 1068.43056       | 534.71892         | 9  |
| 9  | 960.45502      | 480.73115       | 977.48157      | 489.24442       | P         | 917.45093      | 459.22910       | 902.44003      | 903.44785        | 452.22756         | 451.72365       | 901.43220        | 451.21974         | 8  |
| 10 | 1047.48705     | 524.24716       | 1064.51360     | 532.76044       | S         | 820.39816      | 410.70272       | 805.38726      | 806.39509        | 403.70118         | 403.19727       | 804.37944        | 402.69336         | 7  |
| 11 | 1118.52417     | 559.76572       | 1135.55071     | 568.27900       | A         | 733.36613      | 367.18671       | 718.35524      | 719.36306        | 360.18517         | 359.68126       | 717.34741        | 359.17734         | 6  |
| 12 | 1249.56465     | 625.28596       | 1266.59120     | 633.79924       | M         | 662.32902      | 331.66815       | 647.31812      | 648.32595        | 324.66661         | 324.16270       | 646.31030        | 323.65879         | 5  |
| 13 | 1377.62323     | 689.31525       | 1394.64978     | 697.82853       | Q         | 531.28854      | 266.14791       | 516.27764      | 517.28546        | 259.14637         | 258.64246       | 515.26981        | 258.13854         | 4  |
| 14 | 1505.68181     | 753.34454       | 1522.70835     | 761.85782       | Q         | 403.22996      | 202.11862       | 388.21906      | 389.22689        | 195.11708         | 194.61317       | 387.21124        | 194.10926         | 3  |
| 15 | 1633.74038     | 817.37383       | 1650.76693     | 825.88710       | Q         | 275.17138      | 138.08933       | 260.16048      | 261.16831        | 131.08779         | 130.58388       | 259.15266        | 130.07997         | 2  |
| 16 |                |                 |                |                 | K         | 147.11280      | 74.06004        | 132.10191      | 133.10973        | 67.05850          | 66.55459        | 131.09408        | 66.05068          | 1  |

# Ser817

Sequence: DGLDRTELLPLSPLSPTMEEELIIFLSGDEDETEKVEEK, S15-Phospho (79.96633 Da), M18-Oxidation (15.99492 Da)

Charge: +4, Monoisotopic m/z: 1121.04089 Da (-0.97 mmu/-0.87 ppm), MH+: 4481.14174 Da, RT: 72.5007 min, Identified with: Sequest HT (v1.17); XCorr:2.72,

ptmRS: Best Site Probabilities:S15(Phospho): 97.26, Fragment match tolerance used for search: 0.02 Da

07052019\_04-1\_7842\_1h0DA.raw #17522 RT: 72.5007 min

FTMS: 1121.04089@ms2.00, z=4, Mono m/z: 1121.04089 Da, MH+=4481.14174 Da, Match Tol=0.02 Da

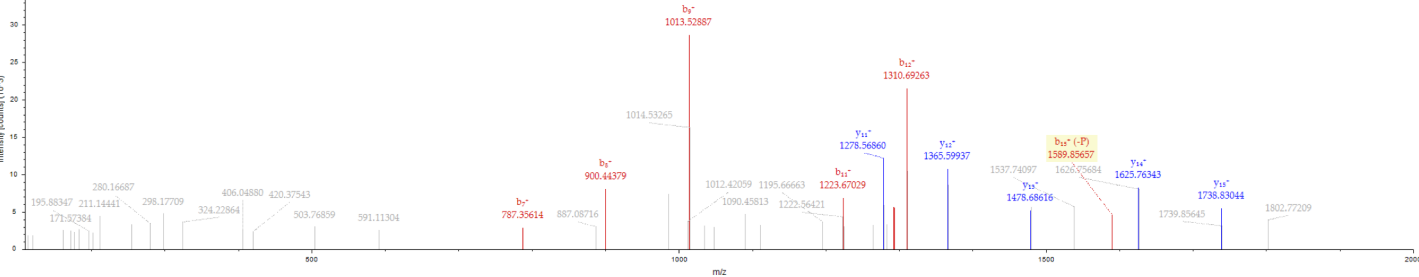

| #1 | b <sup>+</sup> | b <sup>2+</sup> | b <sup>3+</sup> | b <sup>4+</sup> | Seq.        | y <sup>+</sup> | y <sup>2+</sup> | y <sup>3+</sup> | y <sup>4+</sup> | #2 |
|----|----------------|-----------------|-----------------|-----------------|-------------|----------------|-----------------|-----------------|-----------------|----|
| 1  | 116.03422      | 58.52075        | 39.34959        | 29.76401        | D           |                |                 |                 |                 | 39 |
| 2  | 173.05568      | 87.03148        | 58.35675        | 44.01938        | G           | 4366.11869     | 2183.56298      | 1456.04441      | 1092.28513      | 38 |
| 3  | 286.13975      | 143.57351       | 96.05143        | 72.29039        | L           | 4309.09722     | 2155.05225      | 1437.03726      | 1078.02976      | 37 |
| 4  | 401.16669      | 201.08698       | 134.39375       | 101.04713       | D           | 4196.01316     | 2098.51022      | 1399.34257      | 1049.75875      | 36 |
| 5  | 557.26780      | 279.13754       | 186.42745       | 140.07241       | R           | 4080.98622     | 2040.99675      | 1361.00026      | 1021.00201      | 35 |
| 6  | 658.31548      | 329.66138       | 220.11001       | 165.33433       | T           | 3924.88511     | 1962.94619      | 1308.96655      | 981.97673       | 34 |
| 7  | 787.35807      | 394.18267       | 263.12421       | 197.59498       | E           | 3823.83743     | 1912.42235      | 1275.28399      | 956.71481       | 33 |
| 8  | 900.44214      | 450.72471       | 300.81890       | 225.86599       | L           | 3694.79483     | 1847.90106      | 1232.26980      | 924.45417       | 32 |
| 9  | 1013.52620     | 507.26674       | 338.51358       | 254.13701       | L           | 3581.71077     | 1791.35902      | 1194.57511      | 896.18315       | 31 |
| 10 | 1110.57896     | 555.79312       | 370.86451       | 278.40020       | P           | 3468.62671     | 1734.81699      | 1156.88042      | 867.91213       | 30 |
| 11 | 1223.66303     | 612.33515       | 408.55919       | 306.67121       | L           | 3371.57394     | 1686.29061      | 1124.52950      | 843.64894       | 29 |
| 12 | 1310.69506     | 655.85117       | 437.56987       | 328.42922       | S           | 3258.48988     | 1629.74858      | 1086.83481      | 815.37793       | 28 |
| 13 | 1407.74782     | 704.37755       | 469.92079       | 352.69241       | P           | 3171.45785     | 1586.23256      | 1057.82413      | 793.61992       | 27 |
| 14 | 1520.83188     | 760.91958       | 507.61548       | 380.96343       | L           | 3074.40509     | 1537.70618      | 1025.47321      | 769.35673       | 26 |
| 15 | 1687.83024     | 844.41876       | 563.28160       | 422.71302       | S-Phospho   | 2961.32102     | 1481.16415      | 987.77853       | 741.08571       | 25 |
| 16 | 1784.88301     | 892.94514       | 595.63252       | 446.97621       | P           | 2794.32266     | 1397.66497      | 932.11241       | 699.33612       | 24 |
| 17 | 1885.93069     | 943.46898       | 629.31508       | 472.23813       | T           | 2697.26990     | 1349.13859      | 899.76148       | 675.07293       | 23 |
| 18 | 2032.96609     | 1016.98668      | 678.32688       | 508.99698       | M-Oxidation | 2596.22222     | 1298.61475      | 866.07892       | 649.81101       | 22 |
| 19 | 2162.00868     | 1081.50798      | 721.34108       | 541.25763       | E           | 2449.18682     | 1225.09705      | 817.06713       | 613.05216       | 21 |
| 20 | 2291.05127     | 1146.02927      | 764.35527       | 573.51828       | E           | 2320.14423     | 1160.57575      | 774.05293       | 580.79151       | 20 |
| 21 | 2420.09386     | 1210.55057      | 807.36947       | 605.77892       | E           | 2191.10164     | 1096.05446      | 731.03873       | 548.53087       | 19 |
| 22 | 2517.14663     | 1259.07695      | 839.72039       | 630.04211       | P           | 2062.05904     | 1031.53316      | 688.02453       | 516.27022       | 18 |
| 23 | 2630.23069     | 1315.61898      | 877.41508       | 658.31313       | L           | 1965.00628     | 983.00678       | 655.67361       | 492.00703       | 17 |
| 24 | 2743.31476     | 1372.16102      | 915.10977       | 686.58415       | I           | 1851.92222     | 926.46475       | 617.97892       | 463.73601       | 16 |
| 25 | 2856.39882     | 1428.70305      | 952.80446       | 714.85516       | I           | 1738.83815     | 869.92271       | 580.28423       | 435.46500       | 15 |
| 26 | 3003.46723     | 1502.23726      | 1001.82726      | 751.62227       | F           | 1625.75409     | 813.38068       | 542.58955       | 407.19398       | 14 |
| 27 | 3116.55130     | 1558.77929      | 1039.52195      | 779.89328       | L           | 1478.68567     | 739.84648       | 493.56674       | 370.42688       | 13 |
| 28 | 3203.58333     | 1602.29530      | 1068.53263      | 801.65129       | S           | 1365.60161     | 683.30444       | 455.87205       | 342.15586       | 12 |
| 29 | 3260.60479     | 1630.80603      | 1087.53978      | 815.90665       | G           | 1278.56958     | 639.78843       | 426.86138       | 320.39785       | 11 |
| 30 | 3375.63173     | 1688.31950      | 1125.88210      | 844.66339       | D           | 1221.54812     | 611.27770       | 407.85422       | 306.14249       | 10 |
| 31 | 3504.67433     | 1752.84080      | 1168.89629      | 876.92404       | E           | 1106.52117     | 553.76423       | 369.51191       | 277.38575       | 9  |
| 32 | 3619.70127     | 1810.35427      | 1207.23861      | 905.68077       | D           | 977.47858      | 489.24293       | 326.49771       | 245.12510       | 8  |
| 33 | 3720.74895     | 1860.87811      | 1240.92117      | 930.94269       | T           | 862.45164      | 431.72946       | 288.15540       | 216.36837       | 7  |
| 34 | 3849.79154     | 1925.39941      | 1283.93536      | 963.20334       | E           | 761.40396      | 381.20562       | 254.47284       | 191.10645       | 6  |
| 35 | 3977.88650     | 1989.44689      | 1326.63369      | 995.22708       | K           | 632.36137      | 316.68432       | 211.45864       | 158.84580       | 5  |
| 36 | 4076.95492     | 2038.98110      | 1359.65649      | 1019.99419      | V           | 504.26640      | 252.63684       | 168.76032       | 126.82206       | 4  |
| 37 | 4205.99751     | 2103.50239      | 1402.67069      | 1052.25483      | E           | 405.19799      | 203.10263       | 135.73751       | 102.05496       | 3  |
| 38 | 4335.04010     | 2168.02369      | 1445.68489      | 1084.51548      | E           | 276.15540      | 138.58134       | 92.72332        | 69.79431        | 2  |
| 39 |                |                 |                 |                 | K           | 147.11280      | 74.06004        | 49.70912        | 37.53366        | 1  |
